# Supplementary material for: The effect of resveratrol supplementation on the expression levels of factors associated with cellular senescence and sCD163/sTWEAK ratio in patients with type 2 diabetes mellitus: study protocol for a double-blind controlled randomised clinical trial
Source: PubMed Central journal article supplement — BMJ Open. 2019 Jul 4;9(7):e026337. doi: 10.1136/bmjopen-2018-026337 (PMC6615841; doi:10.1136/bmjopen-2018-026337), 2019-07-04
Supplement: bmjopen-2018-026337.draft_revisions.pdf [file bmjopen-2018-026337.draft_revisions.pdf]

# BMJ Open

BMJ Open is committed to open peer review. As part of this commitment we make the peer review history of every article we publish publicly available.

When an article is published we post the peer reviewers' comments and the authors' responses online. We also post the versions of the paper that were used during peer review. These are the versions that the peer review comments apply to.

The versions of the paper that follow are the versions that were submitted during the peer review process. They are not the versions of record or the final published versions. They should not be cited or distributed as the published version of this manuscript.

BMJ Open is an open access journal and the full, final, typeset and author-corrected version of record of the manuscript is available on our site with no access controls, subscription charges or pay-per-view fees (<http://bmjopen.bmj.com>).

If you have any questions on BMJ Open's open peer review process please email [info.bmjopen@bmj.com](mailto:info.bmjopen@bmj.com)

# BMJ Open

**The effect of resveratrol supplementation on the expression levels of factors associated with cellular senescence and sCD163/sTWEAK ratio in Patients with Type 2 Diabetes Mellitus: Study Protocol for a double blind Controlled Randomized Clinical Trial**

|                               |                                                                                                                                                                                                                                                                                          |
|-------------------------------|------------------------------------------------------------------------------------------------------------------------------------------------------------------------------------------------------------------------------------------------------------------------------------------|
| Journal:                      | <i>BMJ Open</i>                                                                                                                                                                                                                                                                          |
| Manuscript ID                 | bmjopen-2018-026337                                                                                                                                                                                                                                                                      |
| Article Type:                 | Protocol                                                                                                                                                                                                                                                                                 |
| Date Submitted by the Author: | 27-Aug-2018                                                                                                                                                                                                                                                                              |
| Complete List of Authors:     | Abdollahi, Shima<br>Salehi-Abargouei , Amin<br>tabatabaie, Mahtab<br>sheikhha, Mohammad Hasan<br>Fallahzadeh, Hossein<br>Rahmanian, Masoud<br>Toupchian, Omid<br>Karimi-Nazari, Elham<br>mozaffari-khosravi, hassan; Shahid Sadoughi University of Medical Sciences and Health Services, |
| Keywords:                     | Type 2 diabetes mellitus, Cardiovascular Diseases, Resveratrol, Peroxisome Proliferator Activated Receptors, p53, p16                                                                                                                                                                    |
|                               |                                                                                                                                                                                                                                                                                          |

SCHOLARONE™  
Manuscripts

1                   1       **The effect of resveratrol supplementation on the expression levels of**  
2                   2       **factors associated with cellular senescence and sCD163/sTWEAK ratio**  
3                   3       **in Patients with Type 2 Diabetes Mellitus: Study Protocol for a double**  
4                   4       **blind Controlled Randomized Clinical Trial**

5  
6                   6       Shima Abdollahi<sup>1,2</sup>, Amin Salehi-Abargouei<sup>1,2</sup>, Mahtab Tabatabaie<sup>1,2</sup>, Mohammad  
7                   7       Hasan Sheikhha<sup>3,4</sup>, Hossein Fallahzadeh<sup>5</sup>, Masoud Rahmanian<sup>6</sup>, Omid Toupchian<sup>7</sup>,  
8                   8       Elham Karimi-Nazari<sup>1,8</sup>, Hassan Mozaffari-khosravi<sup>1,2\*</sup>

9  
10                  10       <sup>1</sup> Nutrition and Food Security Research Center, Shahid Sadoughi University of Medical  
11                  11       Sciences, Yazd, Iran.

12                  12       <sup>2</sup> Department of Nutrition, School of Public Health, Shahid Sadoughi University of  
13                  13       Medical Sciences, Yazd, Iran.

14                  14       <sup>3</sup> Department of Genetics, Faculty of Medicine, Yazd, Iran.

15                  15       <sup>4</sup> Yazd Clinical and Research Center for Infertility, Yazd, Iran.

16                  16       <sup>5</sup> Department of Biostatistics and Epidemiology, Research Center of Prevention and  
17                  17       Epidemiology of Non-Communicable Disease, School of Health, Shahid Sadoughi  
18                  18       University of Medical Sciences, Yazd, Iran.

19                  19       <sup>6</sup> Department of Endocrinology and Metabolism, Shahid Sadoughi University of  
20                  20       Medical Sciences and Health Services, Yazd, Iran.

21                  21       <sup>7</sup> School of Public Health, North Khorasan University of Medical Sciences, Bojnurd,  
22                  22       Iran.

23                  23       <sup>8</sup> Biological Sciences and Technology Institute, Malek Ashtar University of  
24                  24       Technology, Tehran, Iran.

25  
26                  26       Address all correspondence and requests for reprints to: Hassan Mozaffari-khosravi,  
27                  27       Nutrition and Food Security Research Center, Shahid Sadoughi University of Medical

1  
2 28 Sciences, Yazd, Iran and Department of Nutrition, School of Public Health, Shahid  
3  
4 29 Sadoughi University of Medical Sciences, Yazd, Iran.  
5  
6 30 E-mail: [dr.mozaffarihasan@gmail.com](mailto:dr.mozaffarihasan@gmail.com)  
7  
8 31 Tel: (9835)38209143  
9  
10 32 Email addresses:  
11  
12 33 Shima Abdollahi: [sh.abd6864@yahoo.com](mailto:sh.abd6864@yahoo.com)  
13  
14 34 Amin Salehi-Abargouei: [abargouei@gmail.com](mailto:abargouei@gmail.com)  
15  
16 35 Mohammad Hasan Sheikhha: [sheikhha@yahoo.com](mailto:sheikhha@yahoo.com)  
17  
18 36 Hossein Fallahzadeh: [fallahzadeh.ho@gmail.com](mailto:fallahzadeh.ho@gmail.com)  
19  
20 37 Masoud Rahmanian: [drmasoudrahmanian@yahoo.com](mailto:drmasoudrahmanian@yahoo.com)  
21  
22 38 Omid Toupchian: [o.toupchian@gmail.com](mailto:o.toupchian@gmail.com)  
23  
24 39 Mahtab Tabatabaie: [mahtab.tabatabaie.fb@gmail.com](mailto:mahtab.tabatabaie.fb@gmail.com)  
25  
26 40 elham karimi-Nazari: [elham939k@gmail.com](mailto:elham939k@gmail.com)  
27  
28 41 Hassan Mozaffari-khosravi: [dr.mozaffarihasan@gmail.com](mailto:dr.mozaffarihasan@gmail.com)  
29  
30  
31  
32  
33  
34  
35  
36  
37  
38  
39  
40  
41  
42  
43  
44  
45  
46  
47  
48  
49  
50  
51  
52  
53  
54  
55  
56  
57  
58  
59  
60

1  
2  
3  
4  
5  
6  
7  
8  
9  
10  
11  
12  
13  
14  
15  
16  
17  
18  
19  
20  
21  
22  
23  
24  
25  
26  
27  
28  
29  
30  
31  
32  
33  
34  
35  
36  
37  
38  
39  
40  
41  
42  
43  
44  
45  
46  
47  
48  
49  
50  
51  
52  
53

53 **Abstract**

54 **Introduction:** Type 2 Diabetes Mellitus (T2DM) is one of the challenges of the health  
55 care system. Over the past decades, the numbers of people with diabetes has increased,  
56 globally. One of the major complication in these patients is cardiovascular disease; it  
57 seems that the cell cycle arrest can improve vascular function in these patients.  
58 Resveratrol is a natural polyphenol and appears to improve the vascular function  
59 through several cellular pathways. We will aim to evaluate the effects of resveratrol  
60 supplementation on mRNA expression of peroxisome proliferator activated receptor  
61 alpha (PPAR $\alpha$ ), tumor suppressor protein p53, cyclin-dependent kinase inhibitor 1  
62 (p21) and Cyclin-dependent kinase inhibitor 2A (p16) in patients with T2DM. We will  
63 also measure serum levels of Cluster of Differentiation 163 (CD163) and TNF-like  
64 weak inducer of apoptosis (TWEAK) as the indicators of cardiovascular status.

65 **Methods and analysis:** Seventy-two subjects suffering from T2DM will be participated  
66 in this double blind randomized controlled clinical trial. Participants will be randomly  
67 assigned to receive 1000 mg/day trans-resveratrol or placebo (methyl cellulose) for 8  
68 weeks. The mRNA expression levels of PPAR $\alpha$ , p53, p21 and p16 genes will be  
69 assessed using real-time polymerase chain reaction (PCR) and serum CD163 and  
70 TWEAK levels will be measured using commercially available ELISA kits at the  
71 baseline and the end of the study.

72 **Ethics and dissemination:** The study is performed in agreement with the Declaration  
73 of Helsinki and is approved by the Ethics Committee of the Shahid Sadoughi University  
74 of Medical Sciences (no: ir.ssu.sph.rec.1396.120). The results will be published in  
75 scientific journals. We will also use conferences and social media to disseminate our  
76 findings.

77 Trial registration number: IRCT20171118037528N1, Registered 29 December  
78 2017)

1  
2 79  
3

4 80 **Keywords:** *Type 2 diabetes mellitus, Cardiovascular Diseases, Resveratrol,*

5  
6 81 *Peroxisome Proliferator Activated Receptors, p53, p16, p21, TWEAK, CD163*

7  
8 82  
9

10 83 **‘Strengths and limitations of this study’**

- 11  
12  
13 84 • To our knowledge, this is the first human study to investigate the effects of  
14  
15 85 resveratrol supplementation on the cellular factors associated with intima  
16  
17 86 hyperplasia through the cellular pathways.  
18  
19 87 • This study is a first trial that uses resveratrol as a natural ligand for PPAR $\alpha$ .  
20  
21  
22 88 • The study is not designed to follow up the patients to determine the long-term  
23  
24 89 effects of resveratrol supplementation.  
25  
26  
27 90  
28  
29  
30 91  
31  
32  
33 92  
34  
35  
36 93  
37  
38  
39 94  
40  
41  
42 95  
43  
44  
45 96  
46  
47  
48 97  
49  
50  
51 98  
52  
53  
54 99  
55  
56  
57 100

## 101 **Introduction**

102 With an increasing trend in its prevalence, type 2 diabetes mellitus (T2DM) has become  
103 one of the important causes of mortality and morbidity worldwide (1-3). uncontrolled  
104 T2DM might lead to a broad range of micro- and macro-vascular complications  
105 including vascular dysfunction and cardiovascular disease (CVD) (4-6). Atherosclerosis  
106 is one of the most important causes of CVD which leads to intima hyperplasia (IH) (4).  
107 IH is associated with CVD and recently, it has been suggested to be added to the  
108 Framingham risk factors (7). In addition, IH might lead to the restenosis after  
109 percutaneous transluminal angioplasty or vascular graft and it is known as one of the  
110 major complications during the treatment of CVD (8-10). Proliferation of Vascular  
111 Smooth Muscle Cells (VSMCs) is increased during IH and is in accordance with  
112 vascular stenosis and heart attack (11). Recent animal studies indicated that the  
113 VSMCs' proliferation inhibition through cell cycle arrest can reduce the IH levels (12,  
114 13).

115 Some cellular studies suggest that peroxisome proliferator activated receptors (PPARs)  
116 also play a key role in VSMCs' proliferation (14, 15). PPARs are a group of nuclear  
117 receptors with various isoforms, including  $\alpha$ ,  $\beta/\delta$  and  $\gamma$  that are involved in transcription  
118 regulation of a broad range of genes (16, 17). PPAR $\alpha$  is one of the members of this  
119 family and has a critical role in the regulation of genes involved in fatty acid oxidation,  
120 glucose metabolism, vascular function, obesity, cell proliferation, plaque stability and  
121 inflammation (18, 19). Some body of evidences showed that PPAR $\alpha$  activation might  
122 arrest the cell cycle progression in G<sub>1</sub>/S phase through induction of the p16INK4a (6,  
123 20). Cyclin-dependent kinase inhibitor 2A, which is also known as p16INK4a, is a  
124 tumor suppressor that inhibits CDK4-mediated phosphorylation of retinoblastoma and  
125 inhibits induction of E2F-dependent genes and therefore suppresses cell cycle  
126 progression (21-23).

1  
2 127 Resveratrol (3,5,4'-trihydroxy-trans-stilbene), which is structurally known as stilbenoid  
3  
4 128 and phytoalexin, is a type of natural polyphenol found mostly in red grapes; it has been  
5  
6 129 introduced as a ligand of PPAR $\alpha$  and it seems to stimulate cellular senescence through  
7  
8 130 the above mentioned pathways (24-26). It also has been proposed that resveratrol has  
9  
10 131 the potential to activate p53, another important tumor suppressor, via phosphorylating  
11  
12 132 the serine residue in p53 protein through extracellular kinases (27, 28); phosphorylated  
13  
14 133 p53 is proposed to be able to upregulate the cyclin-dependent kinase inhibitor 1 (p21)  
15  
16 134 gene, which thereby inhibits CDK2 activity and induces the cell cycle arrest in S and  
17  
18 135 G2 phase (29, 30). Animal studies indicated that p53 plays a key role in decreasing the  
19  
20 136 intima thickness (31-34).

21  
22  
23 137 Insulin resistance induces chronic inflammation via increased macrophage activity and  
24  
25 138 overexpression of pro-inflammatory cytokines (35). TNF-related weak inducer of  
26  
27 139 apoptosis (TWEAK) is a member of TNF superfamily which is mainly produced by  
28  
29 140 macrophages and is released into the circulation in its soluble form (sTWEAK) (36).  
30  
31 141 Studies have found that sTWEAK levels are reduced in T1DM, T2DM as well as in the  
32  
33 142 presence of CVD risk factors (37-39). The main cause of reduced sTWEAK levels is its  
34  
35 143 binding to fibroblast growth factor-inducible 14 (Fn14) receptor, which therefore can  
36  
37 144 results in inflammatory responses (40).

38  
39  
40 145 Intraplaque hemorrhage is a common feature of atherosclerotic plaques that is  
41  
42 146 prevalent in patients with T2DM (41, 42); studies have shown that Intraplaque  
43  
44 147 hemorrhage is most likely to occur in unstable plaques and is associated with ischemic  
45  
46 148 stroke (43-45). On the other hand, cluster of differentiation 163 (CD163) is a  
47  
48 149 macrophage scavenger receptor that is involved in the uptake of hemoglobin-  
49  
50 150 haptoglobin complexes and also known as a scavenger of sTWEAK (46, 47); sCD163 is  
51  
52 151 the soluble form of this receptor and it has been proposed that sCD163/sTWEAK ratio  
53  
54 152 can be used as an indicator of the severity and progression of vascular disease (37, 48,  
55  
56  
57



1  
2 153 49). Resveratrol, as an antioxidant, can reduce inflammatory responses and  
3  
4 154 macrophages activity (50) and thus, it seems that resveratrol might affect  
5  
6 155 sCD163/sTWEAK ratio in patients with T2DM.  
7

8 156 We proposed to start a randomized clinical trial (RCT) with the following objectives:  
9

10 157 i. To investigate the effect of resveratrol supplementation on the changes in  
11  
12 158 PPAR $\alpha$ , p16, p53 and p21 gene expression as well as serum level of sCD163  
13  
14 159 and sTWEAK in patients with T2DM.  
15

16 160 ii. To compare the changes in serum levels of lipid profile, including  
17  
18 161 triglyceride, total cholesterol, high density of lipoprotein cholesterol (HDL-  
19  
20 162 C) and low density of lipoprotein cholesterol (LDL-C) as well as glycemic  
21  
22 163 control indices including fasting blood sugar (FBS), fasting insulin,  
23  
24 164 glycosylated hemoglobin (HBA1c) and pancreatic beta cell function and  
25  
26 165 atherogenic index of plasma between the intervention and control groups.  
27  
28  
29

30 166

## 31 32 167 **Methods and analysis**

### 33 34 35 168 ***Study design***

36  
37  
38 169 We designed a double-blind, randomized placebo controlled clinical trial among  
39  
40 170 patients with T2DM; we randomly assigned patients to receive either 1000 mg  
41  
42 171 resveratrol or placebo in a daily manner for two months. This monocentral study will be  
43  
44 172 conducted in Diabetes Clinic Center in Yazd, Iran. The overall overview of the study is  
45  
46 173 presented in Figure 1. Any methodological changes in the study design or sample size,  
47  
48 174 which may potentially affect the patients' safety or study procedures, will be discussed  
49  
50 175 in the committee of ethics before implementation.  
51

52 176

### 53 54 55 177 ***Randomization***

1  
2 178 The present study will be an 8-week double-blind parallel RCT; patients will be  
3  
4 179 randomized 1:1 according to the method of stratified block randomization based on sex  
5  
6 180 (male and female) and age (30-45 and 45-60 years).

7  
8 181 Computer-generated random numbers will be used to randomly allocate eligible  
9  
10 182 participants into the intervention group to receive two 500-mg capsules of resveratrol  
11  
12 183 per day, or placebo group to receive two 500-mg capsules of methylcellulose per day;  
13  
14 184 resveratrol supplements and placebo will be provided in the same shape, color and  
15  
16 185 appearance and will be packed in the same bottles and a person, who is not involved in  
17  
18 186 this project, will label the containers as A or B. Participants and administrators will be  
19  
20 187 unaware about the content of the bottles. Each bottle contains 60 capsules (providing  
21  
22 188 supplement for one month). All participants will be requested to bring back the first  
23  
24 189 bottle after first month and then will be given the second bottle. At the end of the study,  
25  
26 190 if the remained capsules of every patient exceed 10% of the total administered capsules  
27  
28 191 (12 capsules), that patient will be categorized as non-adherent. There will be some  
29  
30 192 advices for enhancing the participant's compliance such as taking capsules with meals.  
31  
32 193 Moreover, patients who complete the intervention will have an 8-hour nutrition  
33  
34 194 education program for free. All randomized patients, including those who will complete  
35  
36 195 the study or those who will not complete due to any reasons, will follow the same  
37  
38 196 schedule.  
39  
40  
41  
42

43 197

44  
45 198 ***Eligibility criteria***

46  
47 199 30 to 60 year-old male and female, who have been diagnosed with established T2DM  
48  
49 200 for at least three months prior to the intervention, will be invited to participate in the  
50  
51 201 study; participants with the following criteria will be excluded: 1) diagnosis of any  
52  
53 202 liver, kidney, cancer and Alzheimer's diseases or gastrointestinal ulcer; 2) pregnancy or  
54  
55 203 lactation; 3) insulin therapy or the HbA1c levels at or above 8% at any point of study;  
56  
57

1  
2 204 4) consumption of supplements containing fish oil, vitamin E or C and red wine in the  
3  
4 205 previous six months; 5) a history of allergic reaction to grapes; 6) consumption of  
5  
6 206 anticoagulants, fibrates and anti-inflammatory agents; 7) a history of myocardial  
7  
8 207 infraction or the presence of stent or battery in patients's heart.  
9

10  
11 208

### 12 13 209 ***Sample size***

14  
15 210 Sample size is calculated based on a pervious human study regarding the PPAR $\alpha$   
16  
17 211 expression in peripheral blood nuclear cells (PBMCs) as the primary variable (51); the  
18  
19 212 participant numbers needed in each group is calculated using a proposed formula for  
20  
21 213 parallel clinical trials via considering  $\alpha=0.05$  and a power of 80% (52). Assuming a  
22  
23 214 20% of dropout rate, the final sample size is set to be 36 participants in each group.  
24  
25

26  
27 215

### 28 29 216 ***Intervention***

30  
31 217 Two trained researchers will introduce the study protocol to the participants. Written  
32  
33 218 consent form will be obtained from all individuals who will decide to participate in the  
34  
35 219 study. Patients will also receive information sheets. The related questionnaires will be  
36  
37 220 reviewed and approved by the ethical committee members.

38  
39 221 Participants in the intervention group will take two capsules of resveratrol per day (one  
40  
41 222 at breakfast and another at dinner) and individuals in the placebo group will take two  
42  
43 223 capsules of 500 mg methylcellulose per day, at the same time for 8 weeks; each capsule  
44  
45 224 of resveratrol contains 500 mg of 99.71% micronized trans-resveratrol (particle size:  
46  
47 225 <1.9  $\mu\text{m}$ ) which provides 495 mg trans-resveratrol without any inactive ingredients,  
48  
49 226 fillers, additives or preservatives (Mega-Resveratrol, USA). Moreover, taking routine  
50  
51 227 drugs prescribed by doctors, due to diabetes, will be permitted until their dosages  
52  
53 228 remain unchanged during the study.  
54  
55  
56  
57  
58  
59  
60

1  
2 229 Any possible adverse event will be reported to the medical ethics committee within a  
3  
4 230 week and Shahid Sadoughi University of Medical Sciences will be responsible for any  
5  
6 231 participation related problems. Some of the participants may withdraw from the study  
7  
8 232 for any reason at any time, before or after signing the consent form; the investigator  
9  
10 233 also may terminate an individual's participation in the study in order to keep the safety  
11  
12 234 and protect the participant from excessive risks and/or to maintain the integrity of data  
13  
14 235 due to the improper follow-up of the procedures by participant.

15  
16  
17 236 General information including age, diseases, medications and supplements will be  
18  
19 237 recorded through interviews at the beginning of the study. In order to obtain the  
20  
21 238 physical activity level, metabolic equivalents (METs) will be calculated through a  
22  
23 239 questionnaire at the beginning and the end of study (53). For assessing the dietary  
24  
25 240 intakes, patients will be asked to complete a three-dietary record form (two weekdays  
26  
27 241 and one weekend day), once at the first week and another at the last week of the  
28  
29 242 intervention; collected data will be analyzed using Nutritionist IV software (The Hearst  
30  
31 243 Corporation, San Bruno, CA). All of the study related data will be stored confidentially.

32  
33  
34 244

#### 35 36 245 *Anthropometric measurements*

37  
38  
39 246 Anthropometric parameters will be measured at the beginning and end of the  
40  
41 247 intervention by the same person; body weight will be measured with light clothing with an  
42  
43 248 accuracy level of 100 gram and height will be measured using Seca stadiometer with an  
44  
45 249 accuracy level of 0.5 cm; waist and hip circumferences will be measured to the nearest  
46  
47 250 0.5 cm according to the standard methods, using a flexible tape (54). Body mass index  
48  
49 251 (BMI) will be calculated by dividing body weight (kg) by the height squared ( $m^2$ ),  
50  
51 252 waist-to hip-ratio (WHR) and waist-to-height ratio (WHtR) will be calculated via  
52  
53 253 standard equations (6). Body composition analysis will be performed via InBody (USA)

1  
2 254 analyzer for estimating the measures of total body fat, abdominal fat, fat free mass and  
3  
4 255 body liquids, before and after the intervention.  
5

6 256

7  
8 257 ***Biochemical measurements***  
9

10  
11 258 After 12 hours of fasting, 10 ml of venous blood will be collected. Biochemical  
12  
13 259 analyses including fasting blood glucose, total cholesterol, triglycerides, HDL-C and  
14  
15 260 LDL-C will be measured using automated enzymatic methods. Circulating insulin level  
16  
17 261 and the percent of HbA1c will be assessed by enzyme-linked immunosorbent assay  
18  
19 262 (ELISA) and high pressure liquid chromatography (HPLC), respectively. Commercially  
20  
21 263 available ELISA kits will be used for estimating serum levels of sCD163 and  
22  
23 264 sTWEAK. Homeostatic model assessment of insulin resistance (HOMA-IR),  
24  
25 265 quantitative insulin sensitivity check index (QUICKI) as an insulin sensitivity index and  
26  
27 266 homeostasis model assessment of beta-cell function (HOMA-B) as well as atherogenic  
28  
29 267 index will be calculated using the suggested formulas (55, 56). All laboratory data will  
30  
31 268 be identified by an ID number to maintain the confidentiality of every participant.  
32  
33  
34

35 269

36  
37 270 ***Gene expression assay***  
38

39  
40 271 After isolating PBMCs from whole blood by Ficoll-paque method (57), total mRNA  
41  
42 272 will be extracted using Blood RNA kit (GeneAll Biotechnology, Korea); total extracted  
43  
44 273 mRNA will be reverse transcribed to cDNA by cDNA synthesis kit (GeneAll  
45  
46 274 Biotechnology, Korea). Real-time polymerase chain reaction (PCR) will be applied to  
47  
48 275 assess the mRNA expression levels of PPAR $\alpha$ , p53, p21 and p16. Glyceraldehyde  
49  
50 276 phosphate dehydrogenase (GAPDH) will be the housekeeping gene in real-time PCR  
51  
52 277 assessments.  
53

54  
55 278  
56  
57  
58  
59  
60

1  
2 279 ***Statistical analysis***  
3

4 280 Principal researchers will have full access to the final data sets. Data entry and  
5  
6 281 statistical analyses will be performed using SPSS for Windows (SPSS, Chicago, IL,  
7  
8 282 USA), version 23.0; categorical data will be presented as number and percentages in  
9  
10 283 study groups. The intervention and the control arms will be compared with each other  
11  
12 284 for primary analysis. One-sample Kolmogorov-Smirnov test will be conducted to check  
13  
14 285 normal distribution of continuous data; continuous variable will be expressed as means  
15  
16 286  $\pm$  SD or median and interquartile range. Independent sample t-test will be carried out  
17  
18 287 for comparing parametric continuous data and Mann-Whitney U test will be used to test  
19  
20 288 the differences in asymmetric variables between the two groups. Pearson's correlation  
21  
22 289 coefficient will be applied to show the correlation between biochemical and  
23  
24 290 anthropometric indices. General linear models will be used to assess the effects of  
25  
26 291 resveratrol relative to placebo after adjustment for baseline values. P-value  $\leq 0.05$  will  
27  
28 292 be defined as statistically significance for all tests.  
29  
30

31  
32 293 Data analysis will be performed on two sets including the intention-to-treat (ITT) and  
33  
34 294 the “per protocol” analysis; ITT analysis considers all patients in the intervention or  
35  
36 295 control groups as originally allocated by randomization, independently of their actual  
37  
38 296 adherence to the determined treatment and it ignores anything that happens after  
39  
40 297 randomization including misallocation, noncompliance, withdrawal or protocol  
41  
42 298 deviations; In the case that researchers observe a significant difference between those  
43  
44 299 who will be allocated to receive the intervention and those who actually will adhere to  
45  
46 300 the intervention, additional analysis will be performed considering the actual adherence  
47  
48 301 to the treatment (per protocol analysis). The results of the two mentioned analyses will  
49  
50 302 be compared with each other.  
51  
52

53  
54 303

55  
56 304 **Ethics and dissemination**  
57

1  
2 305 Written consent form will be obtained from all patients before the study initiation. This  
3  
4 306 protocol is approved by the Ethics Committee of the Shahid Sadoughi University of  
5  
6 307 Medical Sciences (no: ir.ssu.sph.rec.1396.120). This study is registered at the Iranian  
7  
8 308 Registry of Clinical Trials (IRCT20171118037528N1).  
9

### 10 309 **Acknowledgments**

11  
12 310 The authors of this manuscript acknowledge Shahid Sadoughi university of medical  
13  
14 311 sciences, Yazd Diabetes Research Center and INFS.  
15  
16

### 17 312 18 313 **Competing interests statement**

19  
20  
21 314 Part of the cost of this study will be borne by INSF. The funding body had no role in the  
22  
23 315 design of the study or in the writing of this manuscript or decision to submit the  
24  
25 316 manuscript for publication. They will also have no role in any aspect of the described  
26  
27 317 data management, analysis or the reporting of study results. The authors declare that  
28  
29 318 they have no competing interests.  
30  
31

### 32 319 33 34 320 **Funding**

35  
36  
37  
38 321 This study is a PhD thesis and is supported by Shahid Sadoughi University of Medical  
39  
40 322 Sciences. This work is externally supported by Iran's National Science Foundation  
41  
42 323 (INSF) grant and was reviewed by their scientific committee before the funding was  
43  
44 324 approved (grant no: 96010660).  
45  
46

### 47 325 48 326 **Authors' contributions**

49  
50  
51 327 Ash: initial idea of this study, Study design, grant, major contributor in writing the  
52  
53 328 manuscript, reviewed all version of the paper. SA: Study design, grant, reviewed and  
54  
55 329 contributed to manuscript. MH: Study design, grant, reviewed and contributed to  
56  
57

1  
2 330 manuscript, submission. FH: provided statistical expertise in clinical trial design,  
3  
4 331 sample size calculation. ShM and EK: Contributed to design of biochemical procedures,  
5  
6 332 reviewed and contributed to manuscript. RH: Contributed to study design, reviewed and  
7  
8 333 contributed to manuscript. TO: manuscript revisions and edit the final edition of the  
9  
10 334 manuscript. TM: contributed to manuscript and contributed to the edit of the  
11  
12 335 manuscript. All authors read and approved the final manuscript.  
13  
14  
15 336

### 16 17 337 **List of abbreviations**

18  
19 338 PPAR $\alpha$ : peroxisome proliferator activated receptor alpha; p21: cyclin-dependent kinase  
20  
21 339 inhibitor 1; p16: Cyclin-dependent kinase inhibitor 2A; CD163: Cluster of  
22  
23 340 Differentiation 163; TWEAK: TNF-like weak inducer of apoptosis; BMI: Body mass  
24  
25 341 index; GAPDH: Glyceraldehyde phosphate dehydrogenase; WHtR: waist-to-height  
26  
27 342 ratio; WHR: waist-to hip-ratio; ELISA: enzyme-linked immunosorbent assay; HPLC:  
28  
29 343 high pressure liquid chromatography; METs: metabolic equivalents; HDL: high density  
30  
31 344 lipoprotein; LDL: low density lipoprotein; FBS: fasting blood sugar; HBA1c:  
32  
33 345 glycosylated hemoglobin; T2DM: type 2 diabetes mellitus; CVD: cardiovascular  
34  
35 346 disease; ITT: intention-to-treat.  
36  
37  
38  
39 347  
40  
41  
42 348  
43  
44  
45 349  
46  
47 350  
48  
49  
50 351  
51  
52  
53 352  
54  
55  
56 353



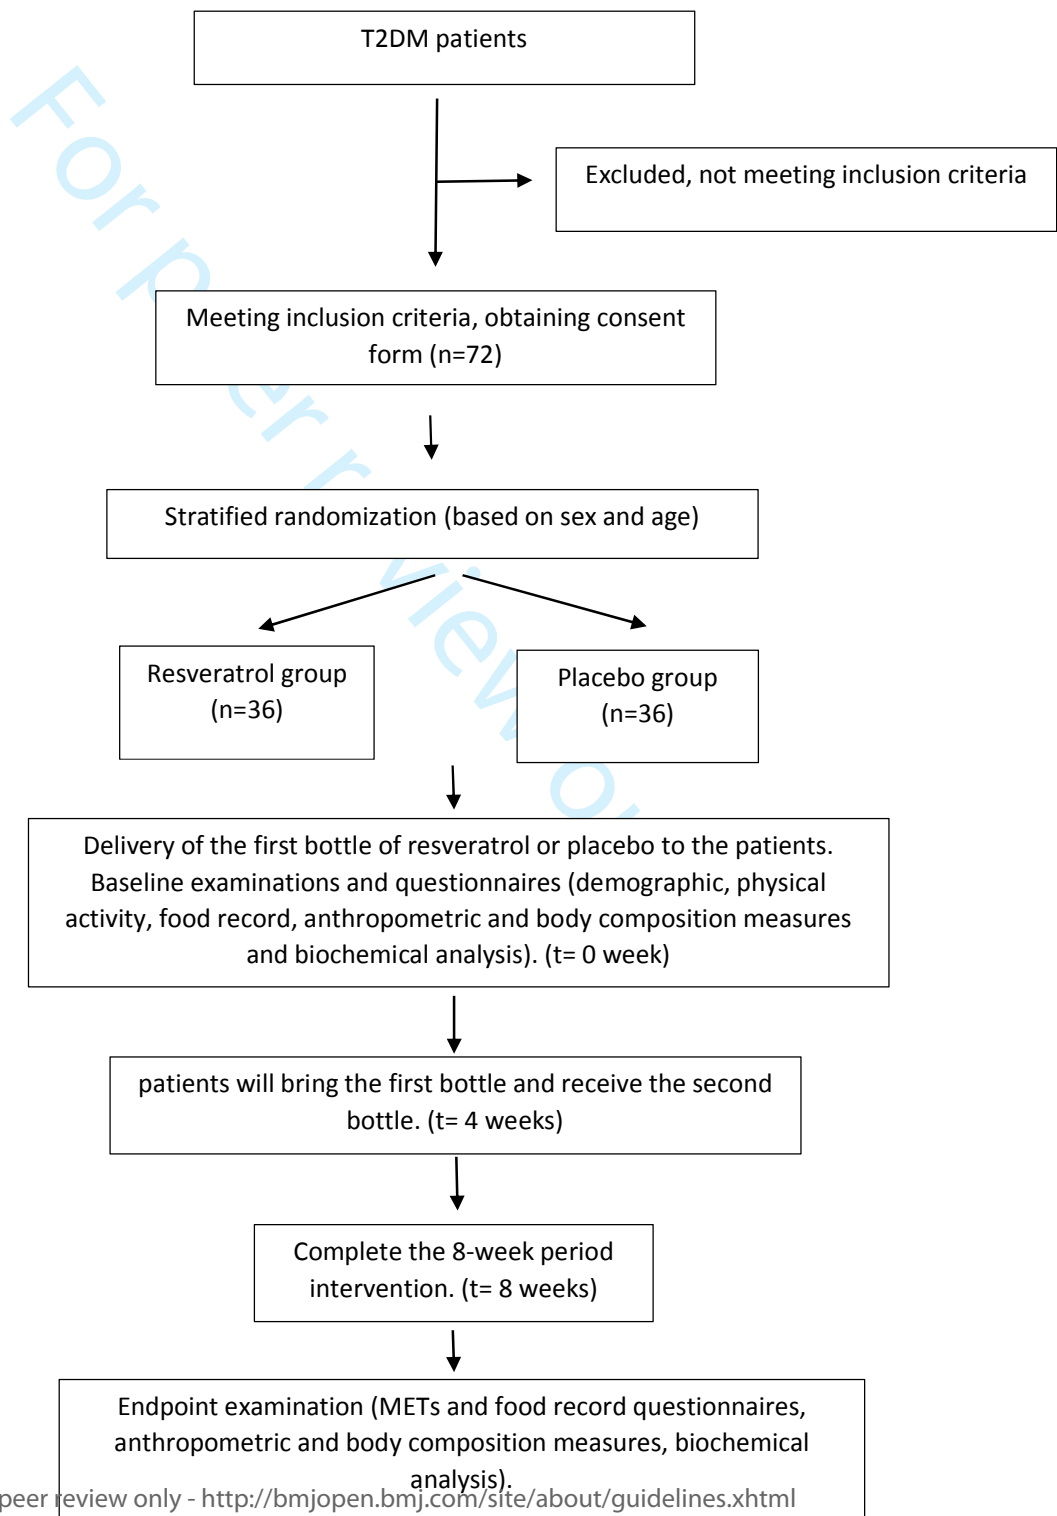

1  
2 379  
3  
4 380  
5 381  
6 382  
7  
8 383  
9 384  
10

Figure 1: Overview of the Study

11 385 **References:**

- 12  
13 386 1. Fowler MJ. Diabetes: Magnitude and mechanisms. *Clinical Diabetes*. 2007;25(1):25-8.  
14 387  
15 388 2. Chen L, Magliano DJ, Zimmet PZ. The worldwide epidemiology of type 2 diabetes  
16 389 mellitus—present and future perspectives. *Nature Reviews Endocrinology*. 2012;8(4):228-36.  
17 390  
18 391 3. Whiting DR, Guariguata L, Weil C, Shaw J. IDF diabetes atlas: global estimates of the  
19 392 prevalence of diabetes for 2011 and 2030. *Diabetes research and clinical practice*.  
20 393 2011;94(3):311-21.  
21 394  
22 395 4. Fowler MJ. Microvascular and macrovascular complications of diabetes. *Clinical*  
23 396 *diabetes*. 2008;26(2):77-82.  
24 397  
25 398 5. Collaboration ERF. Diabetes mellitus, fasting blood glucose concentration, and risk of  
26 399 vascular disease: a collaborative meta-analysis of 102 prospective studies. *The Lancet*.  
27 400 2010;375(9733):2215-22.  
28 401  
29 402 6. Toupchian O, Sotoudeh G, Mansoori A, Nasli-Esfahani E, Djalali M, Keshavarz SA, et al.  
30 403 Effects of DHA-enriched fish oil on monocyte/macrophage activation marker sCD163,  
31 404 asymmetric dimethyl arginine, and insulin resistance in type 2 diabetic patients. *Journal of*  
32 405 *clinical lipidology*. 2016;10(4):798-807.  
33 406  
34 407 7. Polak JF, Pencina MJ, Pencina KM, O'donnell CJ, Wolf PA, D'Agostino Sr RB. Carotid-  
35 408 wall intima-media thickness and cardiovascular events. *New England Journal of Medicine*.  
36 409 2011;365(3):213-21.  
37 410  
38 411 8. Dzau VJ, Braun-Dullaeus RC, Sedding DG. Vascular proliferation and atherosclerosis:  
39 412 new perspectives and therapeutic strategies. *Nature medicine*. 2002;8(11):1249-56.  
40 413  
41 414 9. Orr AW, Hastings NE, Blackman BR, Wamhoff BR. Complex regulation and function of  
42 415 the inflammatory smooth muscle cell phenotype in atherosclerosis. *Journal of vascular*  
43 416 *research*. 2010;47(2):168-80.  
44 417  
45 418 10. Yu H, Payne TJ, Mohanty DK. Effects of Slow, Sustained, and Rate-Tunable Nitric Oxide  
46 419 Donors on Human Aortic Smooth Muscle Cells Proliferation. *Chemical biology & drug design*.  
47 420 2011;78(4):527-34.  
48 421  
49 422 11. Wright RS, Anderson JL, Adams CD, Bridges CR, Casey DE, Ettinger SM, et al. 2011  
50 423 ACCF/AHA focused update incorporated into the ACC/AHA 2007 guidelines for the  
51 424 management of patients with unstable angina/non-ST-elevation myocardial infarction: a  
52 425 report of the American College of Cardiology Foundation/American Heart Association Task  
53 426 Force on Practice Guidelines. *Journal of the American College of Cardiology*. 2011;57(19):e215-  
54 427 e367.  
55  
56  
57  
58  
59  
60

- 1  
2 428  
3 429 12. Wang Z, Zhang X, Chen S, Wang D, Wu J, Liang T, et al. Lithium chloride inhibits  
4 430 vascular smooth muscle cell proliferation and migration and alleviates injury-induced  
5 431 neointimal hyperplasia via induction of PGC-1 $\alpha$ . *PloS one*. 2013;8(1):e55471.  
6 432  
7 433 13. Won KJ, Jung SH, Lee C-K, Na HR, Lee KP, Lee D-Y, et al. DJ-1/park7 protects against  
8 434 neointimal formation via the inhibition of vascular smooth muscle cell growth. *Cardiovascular*  
9 435 *research*. 2012;97(3):553-61.  
10 436 14. Gizard F, Amant C, Barbier O, Bellosta S, Robillard R, Percevault F, et al. PPAR alpha  
11 437 inhibits vascular smooth muscle cell proliferation underlying intimal hyperplasia by inducing  
12 438 the tumor suppressor p16INK4a. *The Journal of clinical investigation*. 2005;115(11):3228-38.  
13 439  
14 440 15. Gizard F, Nomiya T, Zhao Y, Findeisen HM, Heywood EB, Jones KL, et al. The  
15 441 PPARalpha/p16INK4a pathway inhibits vascular smooth muscle cell proliferation by repressing  
16 442 cell cycle-dependent telomerase activation. *Circulation research*. 2008;103(10):1155-63.  
17 443  
18 444 16. Issemann I, Green S. Activation of a member of the steroid hormone receptor  
19 445 superfamily by peroxisome proliferators. *Nature*. 1990;347(6294):645-50.  
20 446  
21 447 17. Kota BP, Huang TH-W, Roufogalis BD. An overview on biological mechanisms of PPARs.  
22 448 *Pharmacological Research*. 2005;51(2):85-94.  
23 449  
24 450 18. Chinetti-Gbaguidi G, Fruchart J-C, Staels B. Role of the PPAR family of nuclear  
25 451 receptors in the regulation of metabolic and cardiovascular homeostasis: new approaches to  
26 452 therapy. *Current opinion in pharmacology*. 2005;5(2):177-83.  
27 453  
28 454 19. Toupchian O, Sotoudeh G, Mansoori A, Djalali M, Keshavarz SA, Nasli-Esfahani E, et al.  
29 455 Effects of DHA Supplementation on Vascular Function, Telomerase Activity in PBMC,  
30 456 Expression of Inflammatory Cytokines, and PPAR $\gamma$ -LXR $\alpha$ -ABCA1 Pathway in Patients With Type  
31 457 2 Diabetes Mellitus: Study Protocol for Randomized Controlled Clinical Trial. *Acta Medica*  
32 458 *Iranica*. 2016;54(7):410-7.  
33 459  
34 460 20. Gizard F, Nomiya T, Zhao Y, Findeisen HM, Heywood EB, Jones KL, et al. The  
35 461 PPAR $\alpha$ /p16INK4a pathway inhibits vascular smooth muscle cell proliferation by repressing cell  
36 462 cycle-dependent telomerase activation. *Circulation research*. 2008;103(10):1155-63.  
37 463  
38 464 21. Walworth NC. Cell-cycle checkpoint kinases: checking in on the cell cycle. *Current*  
39 465 *opinion in cell biology*. 2000;12(6):697-704.  
40 466  
41 467 22. Zhang HS, Gavin M, Dahiya A, Postigo AA, Ma D, Luo RX, et al. Exit from G1 and S  
42 468 phase of the cell cycle is regulated by repressor complexes containing HDAC-Rb-hSWI/SNF and  
43 469 Rb-hSWI/SNF. *Cell*. 2000;101(1):79-89.  
44 470  
45 471 23. Gizard F, Amant C, Barbier O, Bellosta S, Robillard R, Percevault F, et al. PPAR $\alpha$  inhibits  
46 472 vascular smooth muscle cell proliferation underlying intimal hyperplasia by inducing the tumor  
47 473 suppressor p16INK4a. *Journal of Clinical Investigation*. 2005;115(11):3228.  
48 474  
49 475 24. Inoue H, Jiang X-F, Katayama T, Osada S, Umesono K, Namura S. Brain protection by  
50 476 resveratrol and fenofibrate against stroke requires peroxisome proliferator-activated receptor  
51 477  $\alpha$  in mice. *Neuroscience letters*. 2003;352(3):203-6.  
52 478  
53 479 25. Qin S, Lu Y, Rodrigues GA. Resveratrol protects RPE cells from sodium iodate by  
54 480 modulating PPAR $\alpha$  and PPAR $\delta$ . *Experimental eye research*. 2014;118:100-8.

- 1  
2 481  
3 482 26. Takizawa Y, Nakata R, Fukuhara K, Yamashita H, Kubodera H, Inoue H. The 4'-hydroxyl  
4 483 group of resveratrol is functionally important for direct activation of PPAR $\alpha$ . *PloS one*.  
5 484 2015;10(3):e0120865.  
6 485  
7 486 27. Dong Z. Molecular mechanism of the chemopreventive effect of resveratrol. *Mutation*  
8 487 *Research/Fundamental and Molecular Mechanisms of Mutagenesis*. 2003;523:145-50.  
9 488 28. She Q-B, Bode AM, Ma W-Y, Chen N-Y, Dong Z. Resveratrol-induced activation of p53  
10 489 and apoptosis is mediated by extracellular-signal-regulated protein kinases and p38 kinase.  
11 490 *Cancer research*. 2001;61(4):1604-10.  
12 491  
13 492 29. Coppé J-P, Patil CK, Rodier F, Sun Y, Muñoz DP, Goldstein J, et al. Senescence-  
14 493 associated secretory phenotypes reveal cell-nonautonomous functions of oncogenic RAS and  
15 494 the p53 tumor suppressor. *PLoS biology*. 2008;6(12):e301.  
16 495  
17 496 30. Cayrol C, Knibiehler M, Ducommun B. p21 binding to PCNA causes G1 and G2 cell cycle  
18 497 arrest in p53-deficient cells. *Oncogene*. 1998;16(3).  
19 498  
20 499 31. Rosso A, Balsamo A, Gambino R, Dentelli P, Falcioni R, Cassader M, et al. p53 Mediates  
22 500 the accelerated onset of senescence of endothelial progenitor cells in diabetes. *Journal of*  
23 501 *Biological Chemistry*. 2006;281(7):4339-47.  
24 502  
25 503 32. Guevara NV, Kim H-S, Antonova EI, Chan L. The absence of p53 accelerates  
26 504 atherosclerosis by increasing cell proliferation in vivo. *Nature medicine*. 1999;5(3).  
27 505  
28 506 33. Tanner FC, Yang Z-Y, Duckers E, Gordon D, Nabel GJ, Nabel EG. Expression of cyclin-  
29 507 dependent kinase inhibitors in vascular disease. *Circulation research*. 1998;82(3):396-403.  
30 508  
31 509 34. Chang MW, Barr E, Lu MM, Barton K, Leiden JM. Adenovirus-mediated over-  
32 510 expression of the cyclin/cyclin-dependent kinase inhibitor, p21 inhibits vascular smooth  
33 511 muscle cell proliferation and neointima formation in the rat carotid artery model of balloon  
34 512 angioplasty. *Journal of Clinical Investigation*. 1995;96(5):2260.  
35 513  
36 514 35. Kern PA, Ranganathan S, Li C, Wood L, Ranganathan G. Adipose tissue tumor necrosis  
37 515 factor and interleukin-6 expression in human obesity and insulin resistance. *American Journal*  
38 516 *of Physiology-Endocrinology And Metabolism*. 2001;280(5):E745-E51.  
39 517  
40 518 36. Chicheportiche Y, Bourdon PR, Xu H, Hsu Y-M, Scott H, Hession C, et al. TWEAK, a new  
42 519 secreted ligand in the tumor necrosis factor family that weakly induces apoptosis. *Journal of*  
43 520 *Biological Chemistry*. 1997;272(51):32401-10.  
44 521  
45 522 37. Llauro G, Gonzalez-Clemente J-M, Maymo-Masip E, Subías D, Vendrell J, Chacon  
46 523 MR. Serum levels of TWEAK and scavenger receptor CD163 in type 1 diabetes mellitus:  
47 524 relationship with cardiovascular risk factors. a case-control study. *PloS one*. 2012;7(8):e43919.  
48 525  
49 526 38. Kralisch S, Ziegelmeier M, Bachmann A, Seeger J, Lössner U, Blüher M, et al. Serum  
50 527 levels of the atherosclerosis biomarker sTWEAK are decreased in type 2 diabetes and end-  
51 528 stage renal disease. *Atherosclerosis*. 2008;199(2):440-4.  
52 529  
53 530 39. Díaz-López A, Chacón MR, Bulló M, Maymó-Masip E, Martínez-González MA, Estruch  
54 531 R, et al. Serum sTWEAK concentrations and risk of developing type 2 diabetes in a high  
55 532 cardiovascular risk population: a nested case-control study. *The Journal of Clinical*  
56 533 *Endocrinology & Metabolism*. 2013;98(8):3482-90.

- 1  
2 534  
3 535 40. Wiley SR, Winkles JA. TWEAK, a member of the TNF superfamily, is a multifunctional  
4 536 cytokine that binds the TweakR/Fn14 receptor. *Cytokine & growth factor reviews*.  
5 537 2003;14(3):241-9.  
6 538  
7 539 41. Levy A, Moreno P. Intraplaque hemorrhage. *Current molecular medicine*.  
8 540 2006;6(5):479-88.  
9 541 42. Virmani R, Kolodgie FD, Burke AP, Finn AV, Gold HK, Tulenko TN, et al. Atherosclerotic  
10 542 plaque progression and vulnerability to rupture. *Arteriosclerosis, thrombosis, and vascular*  
11 543 *biology*. 2005;25(10):2054-61.  
12 544  
13 545 43. Kockx MM, Cromheeke KM, Knaapen MW, Bosmans JM, De Meyer GR, Herman AG, et  
14 546 al. Phagocytosis and macrophage activation associated with hemorrhagic microvessels in  
15 547 human atherosclerosis. *Arteriosclerosis, thrombosis, and vascular biology*. 2003;23(3):440-6.  
16 548  
17 549 44. Singh N, Moody AR, Gladstone DJ, Leung G, Ravikumar R, Zhan J, et al. Moderate  
18 550 carotid artery stenosis: MR imaging–depicted intraplaque hemorrhage predicts risk of  
19 551 cerebrovascular ischemic events in asymptomatic men. *Radiology*. 2009;252(2):502-8.  
20 552  
21 553 45. Takaya N, Yuan C, Chu B, Saam T, Underhill H, Cai J, et al. Association between carotid  
22 554 plaque characteristics and subsequent ischemic cerebrovascular events. *Stroke*.  
23 555 2006;37(3):818-23.  
24 556  
25 557 46. Fabrick BO, Dijkstra CD, van den Berg TK. The macrophage scavenger receptor CD163.  
26 558 *Immunobiology*. 2005;210(2):153-60.  
27 559  
28 560 47. Bover LC, Cardó-Vila M, Kuniyasu A, Sun J, Rangel R, Takeya M, et al. A previously  
29 561 unrecognized protein-protein interaction between TWEAK and CD163: potential biological  
30 562 implications. *The Journal of Immunology*. 2007;178(12):8183-94.  
31 563  
32 564 48. Urbonaviciene G, Martin-Ventura JL, Lindholt JS, Urbonavicius S, Moreno JA, Egido J, et  
33 565 al. Impact of soluble TWEAK and CD163/TWEAK ratio on long-term cardiovascular mortality in  
34 566 patients with peripheral arterial disease. *Atherosclerosis*. 2011;219(2):892-9.  
35 567  
36 568 49. Moreno JA, Dejouvencel T, Labreuche J, Smadja DM, Dussiot M, Martin-Ventura JL, et  
37 569 al. Peripheral artery disease is associated with a high CD163/TWEAK plasma ratio.  
38 570 *Arteriosclerosis, thrombosis, and vascular biology*. 2010;30(6):1253-62.  
39 571  
40 572 50. Leiro J, Álvarez E, Arranz JA, Laguna R, Uriarte E, Orallo F. Effects of cis-resveratrol on  
41 573 inflammatory murine macrophages: antioxidant activity and down-regulation of inflammatory  
42 574 genes. *Journal of leukocyte biology*. 2004;75(6):1156-65.  
43 575  
44 576 51. D'Amore S, Vacca M, Graziano G, D'Orazio A, Cariello M, Martelli N, et al. Nuclear  
45 577 receptors expression chart in peripheral blood mononuclear cells identifies patients with  
46 578 Metabolic Syndrome. *Biochimica et Biophysica Acta (BBA)-Molecular Basis of Disease*.  
47 579 2013;1832(12):2289-301.  
48 580  
49 581 52. Kirby A, GebSKI V, Keech AC. Determining the sample size in a clinical trial. *Medical*  
50 582 *journal of Australia*. 2002;177(5):256-7.  
51 583  
52 584 53. Aadahl M, Jørgensen T. Validation of a new self-report instrument for measuring  
53 585 physical activity. *Medicine and science in sports and exercise*. 2003;35(7):1196-202.  
54 586  
55  
56  
57  
58  
59  
60

- 1  
2 587 54. Control CfD, Prevention. Anthropometry procedures manual. National Center for  
3 588 Health Statistics: Hyattsville, MD. 2007.  
4 589
- 5 590 55. Rajab A, Azizi F. Ardeh (*Sesamum indicum*) could improve serum triglycerides and  
6 591 atherogenic lipid parameters in type 2 diabetic patients: a randomized clinical trial. Archives of  
7 592 Iranian medicine. 2013;16(11):652.
- 8 593 56. Motamed N, Miresmail SJH, Rabiee B, Keyvani H, Farahani B, Maadi M, et al. Optimal  
9 594 cutoff points for HOMA-IR and QUICKI in the diagnosis of metabolic syndrome and non-  
10 595 alcoholic fatty liver disease: A population based study. Journal of diabetes and its  
11 596 complications. 2016;30(2):269-74.  
12 597
- 13 598 57. Loos J, Roos D. Ficoll-isopaque gradients for the determination of density distributions  
14 599 of human blood lymphocytes and other reticulo-endothelial cells. Experimental cell research.  
15 600 1974;86(2):333-41.  
16 601  
17  
18 602  
19  
20 603  
21  
22  
23  
24  
25  
26  
27  
28  
29  
30  
31  
32  
33  
34  
35  
36  
37  
38  
39  
40  
41  
42  
43  
44  
45  
46  
47  
48  
49  
50  
51  
52  
53  
54  
55  
56  
57  
58  
59  
60

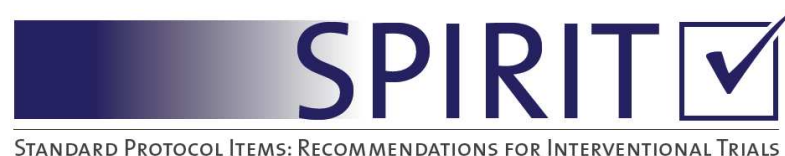

SPIRIT 2013 Checklist: Recommended items to address in a clinical trial protocol and related documents\*

| Section/item                                              | Item No | Description                                                                                                                                                                                                                                                                              | Addressed on page number |
|-----------------------------------------------------------|---------|------------------------------------------------------------------------------------------------------------------------------------------------------------------------------------------------------------------------------------------------------------------------------------------|--------------------------|
| <b>Administrative information</b>                         |         |                                                                                                                                                                                                                                                                                          |                          |
| Title                                                     | 1       | Descriptive title identifying the study design, population, interventions, and, if applicable, trial acronym                                                                                                                                                                             | 1                        |
| Trial registration                                        | 2a      | Trial identifier and registry name. If not yet registered, name of intended registry                                                                                                                                                                                                     | 3                        |
|                                                           | 2b      |                                                                                                                                                                                                                                                                                          |                          |
| Protocol version                                          | 3       | Date and version identifier                                                                                                                                                                                                                                                              | -                        |
| Funding                                                   | 4       | Sources and types of financial, material, and other support                                                                                                                                                                                                                              | 13                       |
| Roles and responsibilities                                | 5a      | Names, affiliations, and roles of protocol contributors                                                                                                                                                                                                                                  | 2 & 13                   |
|                                                           | 5b      | Name and contact information for the trial sponsor                                                                                                                                                                                                                                       | -                        |
|                                                           | 5c      | Role of study sponsor and funders, if any, in study design; collection, management, analysis, and interpretation of data; writing of the report; and the decision to submit the report for publication, including whether they will have ultimate authority over any of these activities | 13                       |
|                                                           | 5d      | Composition, roles, and responsibilities of the coordinating centre, steering committee, endpoint adjudication committee, data management team, and other individuals or groups overseeing the trial, if applicable (see Item 21a for data monitoring committee)                         | -                        |
| <b>Introduction</b>                                       |         |                                                                                                                                                                                                                                                                                          |                          |
| Background and rationale                                  | 6a      | Description of research question and justification for undertaking the trial, including summary of relevant studies (published and unpublished) examining benefits and harms for each intervention                                                                                       | 5-7                      |
|                                                           | 6b      | Explanation for choice of comparators                                                                                                                                                                                                                                                    | -                        |
| Objectives                                                | 7       | Specific objectives or hypotheses                                                                                                                                                                                                                                                        | 7                        |
| Trial design                                              | 8       | Description of trial design including type of trial (eg, parallel group, crossover, factorial, single group), allocation ratio, and framework (eg, superiority, equivalence, noninferiority, exploratory)                                                                                | 7                        |
| <b>Methods: Participants, interventions, and outcomes</b> |         |                                                                                                                                                                                                                                                                                          |                          |

|                                                                     |     |                                                                                                                                                                                                                                                                                                                                                                                |       |
|---------------------------------------------------------------------|-----|--------------------------------------------------------------------------------------------------------------------------------------------------------------------------------------------------------------------------------------------------------------------------------------------------------------------------------------------------------------------------------|-------|
| Study setting                                                       | 9   | Description of study settings (eg, community clinic, academic hospital) and list of countries where data will be collected. Reference to where list of study sites can be obtained                                                                                                                                                                                             | 7     |
| Eligibility criteria                                                | 10  | Inclusion and exclusion criteria for participants. If applicable, eligibility criteria for study centres and individuals who will perform the interventions (eg, surgeons, psychotherapists)                                                                                                                                                                                   | 8 & 9 |
| Interventions                                                       | 11a | Interventions for each group with sufficient detail to allow replication, including how and when they will be administered                                                                                                                                                                                                                                                     | 8     |
|                                                                     | 11b | Criteria for discontinuing or modifying allocated interventions for a given trial participant (eg, drug dose change in response to harms, participant request, or improving/worsening disease)                                                                                                                                                                                 | -     |
|                                                                     | 11c | Strategies to improve adherence to intervention protocols, and any procedures for monitoring adherence (eg, drug tablet return, laboratory tests)                                                                                                                                                                                                                              | 8     |
|                                                                     | 11d | Relevant concomitant care and interventions that are permitted or prohibited during the trial                                                                                                                                                                                                                                                                                  | 9     |
| Outcomes                                                            | 12  | Primary, secondary, and other outcomes, including the specific measurement variable (eg, systolic blood pressure), analysis metric (eg, change from baseline, final value, time to event), method of aggregation (eg, median, proportion), and time point for each outcome. Explanation of the clinical relevance of chosen efficacy and harm outcomes is strongly recommended | 7     |
| Participant timeline                                                | 13  | Time schedule of enrolment, interventions (including any run-ins and washouts), assessments, and visits for participants. A schematic diagram is highly recommended (see Figure)                                                                                                                                                                                               | 15    |
| Sample size                                                         | 14  | Estimated number of participants needed to achieve study objectives and how it was determined, including clinical and statistical assumptions supporting any sample size calculations                                                                                                                                                                                          | 9     |
| Recruitment                                                         | 15  | Strategies for achieving adequate participant enrolment to reach target sample size                                                                                                                                                                                                                                                                                            | -     |
| <b>Methods: Assignment of interventions (for controlled trials)</b> |     |                                                                                                                                                                                                                                                                                                                                                                                |       |
| Allocation:                                                         |     |                                                                                                                                                                                                                                                                                                                                                                                |       |
| Sequence generation                                                 | 16a | Method of generating the allocation sequence (eg, computer-generated random numbers), and list of any factors for stratification. To reduce predictability of a random sequence, details of any planned restriction (eg, blocking) should be provided in a separate document that is unavailable to those who enrol participants or assign interventions                       | 8     |
| Allocation concealment mechanism                                    | 16b | Mechanism of implementing the allocation sequence (eg, central telephone; sequentially numbered, opaque, sealed envelopes), describing any steps to conceal the sequence until interventions are assigned                                                                                                                                                                      | -     |
| Implementation                                                      | 16c | Who will generate the allocation sequence, who will enrol participants, and who will assign participants to interventions                                                                                                                                                                                                                                                      | -     |
| Blinding (masking)                                                  | 17a | Who will be blinded after assignment to interventions (eg, trial participants, care providers, outcome assessors,                                                                                                                                                                                                                                                              | 8     |



|                                                           |     |                                                                                                                                                                                                                                                                                                                                                                                                              |       |
|-----------------------------------------------------------|-----|--------------------------------------------------------------------------------------------------------------------------------------------------------------------------------------------------------------------------------------------------------------------------------------------------------------------------------------------------------------------------------------------------------------|-------|
|                                                           |     | data analysts), and how                                                                                                                                                                                                                                                                                                                                                                                      |       |
|                                                           | 17b | If blinded, circumstances under which unblinding is permissible, and procedure for revealing a participant's allocated intervention during the trial                                                                                                                                                                                                                                                         | -     |
| <b>Methods: Data collection, management, and analysis</b> |     |                                                                                                                                                                                                                                                                                                                                                                                                              |       |
| Data collection methods                                   | 18a | Plans for assessment and collection of outcome, baseline, and other trial data, including any related processes to promote data quality (eg, duplicate measurements, training of assessors) and a description of study instruments (eg, questionnaires, laboratory tests) along with their reliability and validity, if known. Reference to where data collection forms can be found, if not in the protocol | -     |
|                                                           | 18b | Plans to promote participant retention and complete follow-up, including list of any outcome data to be collected for participants who discontinue or deviate from intervention protocols                                                                                                                                                                                                                    | 8     |
| Data management                                           | 19  | Plans for data entry, coding, security, and storage, including any related processes to promote data quality (eg, double data entry; range checks for data values). Reference to where details of data management procedures can be found, if not in the protocol                                                                                                                                            | 10    |
| Statistical methods                                       | 20a | Statistical methods for analysing primary and secondary outcomes. Reference to where other details of the statistical analysis plan can be found, if not in the protocol                                                                                                                                                                                                                                     | 11    |
|                                                           | 20b | Methods for any additional analyses (eg, subgroup and adjusted analyses)                                                                                                                                                                                                                                                                                                                                     | _____ |
|                                                           | 20c | Definition of analysis population relating to protocol non-adherence (eg, as randomised analysis), and any statistical methods to handle missing data (eg, multiple imputation)                                                                                                                                                                                                                              | 12    |
| <b>Methods: Monitoring</b>                                |     |                                                                                                                                                                                                                                                                                                                                                                                                              |       |
| Data monitoring                                           | 21a | Composition of data monitoring committee (DMC); summary of its role and reporting structure; statement of whether it is independent from the sponsor and competing interests; and reference to where further details about its charter can be found, if not in the protocol. Alternatively, an explanation of why a DMC is not needed                                                                        | _____ |
|                                                           | 21b | Description of any interim analyses and stopping guidelines, including who will have access to these interim results and make the final decision to terminate the trial                                                                                                                                                                                                                                      | 12    |
| Harms                                                     | 22  | Plans for collecting, assessing, reporting, and managing solicited and spontaneously reported adverse events and other unintended effects of trial interventions or trial conduct                                                                                                                                                                                                                            | 9     |
| Auditing                                                  | 23  | Frequency and procedures for auditing trial conduct, if any, and whether the process will be independent from investigators and the sponsor                                                                                                                                                                                                                                                                  | _____ |
| <b>Ethics and dissemination</b>                           |     |                                                                                                                                                                                                                                                                                                                                                                                                              |       |
| Research ethics approval                                  | 24  | Plans for seeking research ethics committee/institutional review board (REC/IRB) approval                                                                                                                                                                                                                                                                                                                    | _____ |

|                               |     |                                                                                                                                                                                                                                                                                     |       |
|-------------------------------|-----|-------------------------------------------------------------------------------------------------------------------------------------------------------------------------------------------------------------------------------------------------------------------------------------|-------|
| Protocol amendments           | 25  | Plans for communicating important protocol modifications (eg, changes to eligibility criteria, outcomes, analyses) to relevant parties (eg, investigators, REC/IRBs, trial participants, trial registries, journals, regulators)                                                    | 7     |
| Consent or assent             | 26a | Who will obtain informed consent or assent from potential trial participants or authorised surrogates, and how (see Item 32)                                                                                                                                                        | _____ |
|                               | 26b | Additional consent provisions for collection and use of participant data and biological specimens in ancillary studies, if applicable                                                                                                                                               | _____ |
| Confidentiality               | 27  | How personal information about potential and enrolled participants will be collected, shared, and maintained in order to protect confidentiality before, during, and after the trial                                                                                                | 10    |
| Declaration of interests      | 28  | Financial and other competing interests for principal investigators for the overall trial and each study site                                                                                                                                                                       | 13    |
| Access to data                | 29  | Statement of who will have access to the final trial dataset, and disclosure of contractual agreements that limit such access for investigators                                                                                                                                     | 11    |
| Ancillary and post-trial care | 30  | Provisions, if any, for ancillary and post-trial care, and for compensation to those who suffer harm from trial participation                                                                                                                                                       | 9     |
| Dissemination policy          | 31a | Plans for investigators and sponsor to communicate trial results to participants, healthcare professionals, the public, and other relevant groups (eg, via publication, reporting in results databases, or other data sharing arrangements), including any publication restrictions | _____ |
|                               | 31b | Authorship eligibility guidelines and any intended use of professional writers                                                                                                                                                                                                      | _____ |
|                               | 31c | Plans, if any, for granting public access to the full protocol, participant-level dataset, and statistical code                                                                                                                                                                     | _____ |
| <b>Appendices</b>             |     |                                                                                                                                                                                                                                                                                     |       |
| Informed consent materials    | 32  | Model consent form and other related documentation given to participants and authorised surrogates                                                                                                                                                                                  | _____ |
| Biological specimens          | 33  | Plans for collection, laboratory evaluation, and storage of biological specimens for genetic or molecular analysis in the current trial and for future use in ancillary studies, if applicable                                                                                      | _____ |

\*It is strongly recommended that this checklist be read in conjunction with the SPIRIT 2013 Explanation & Elaboration for important clarification on the items. Amendments to the protocol should be tracked and dated. The SPIRIT checklist is copyrighted by the SPIRIT Group under the Creative Commons "[Attribution-NonCommercial-NoDerivs 3.0 Unported](https://creativecommons.org/licenses/by-nc-nd/3.0/)" license.

# BMJ Open

**The effect of resveratrol supplementation on the expression levels of factors associated with cellular senescence and sCD163/sTWEAK ratio in patients with type 2 diabetes mellitus: study protocol for a double-blind controlled randomized clinical trial**

|                                 |                                                                                                                                                                                                                                                                                                                                                                                                                                                                                                                                                                                                                                                                                                                                                                                                                                                                                                                 |
|---------------------------------|-----------------------------------------------------------------------------------------------------------------------------------------------------------------------------------------------------------------------------------------------------------------------------------------------------------------------------------------------------------------------------------------------------------------------------------------------------------------------------------------------------------------------------------------------------------------------------------------------------------------------------------------------------------------------------------------------------------------------------------------------------------------------------------------------------------------------------------------------------------------------------------------------------------------|
| Journal:                        | <i>BMJ Open</i>                                                                                                                                                                                                                                                                                                                                                                                                                                                                                                                                                                                                                                                                                                                                                                                                                                                                                                 |
| Manuscript ID                   | bmjopen-2018-026337.R1                                                                                                                                                                                                                                                                                                                                                                                                                                                                                                                                                                                                                                                                                                                                                                                                                                                                                          |
| Article Type:                   | Protocol                                                                                                                                                                                                                                                                                                                                                                                                                                                                                                                                                                                                                                                                                                                                                                                                                                                                                                        |
| Date Submitted by the Author:   | 25-Mar-2019                                                                                                                                                                                                                                                                                                                                                                                                                                                                                                                                                                                                                                                                                                                                                                                                                                                                                                     |
| Complete List of Authors:       | Abdollahi, Shima; Shahid Sadoughi University of Medical Sciences and Health Services, Department of Nutrition<br>Salehi-Abargouei , Amin; Shahid Sadoughi University of Medical Sciences and Health Services<br>tabatabaie, Mahtab; Shahid Sadoughi University of Medical Sciences and Health Services<br>sheikhha, Mohammad Hasan; Shahid Sadoughi University of Medical Sciences and Health Services Yazd Research and Clinical Centre for Infertility<br>Fallahzadeh, Hossein; Shahid Sadoughi University of Medical Sciences and Health Services<br>Rahmanian, Masoud; Shahid Sadoughi University of Medical Sciences and Health Services Yazd Diabetic Research Centre<br>Toupchian, Omid; North Khorasan University of Medical Sciences<br>Karimi-Nazari, Elham; Malek-Ashtar University of Technology<br>mozaffari-khosravi, hassan; Shahid Sadoughi University of Medical Sciences and Health Services, |
| <b>Primary Subject Heading</b>: | Diabetes and endocrinology                                                                                                                                                                                                                                                                                                                                                                                                                                                                                                                                                                                                                                                                                                                                                                                                                                                                                      |
| Secondary Subject Heading:      | Cardiovascular medicine, Genetics and genomics, Nutrition and metabolism                                                                                                                                                                                                                                                                                                                                                                                                                                                                                                                                                                                                                                                                                                                                                                                                                                        |
| Keywords:                       | Type 2 diabetes mellitus, Cardiovascular Diseases, Resveratrol, Peroxisome Proliferator Activated Receptors, p53, p16                                                                                                                                                                                                                                                                                                                                                                                                                                                                                                                                                                                                                                                                                                                                                                                           |
|                                 |                                                                                                                                                                                                                                                                                                                                                                                                                                                                                                                                                                                                                                                                                                                                                                                                                                                                                                                 |

SCHOLARONE™  
Manuscripts

1  
2  
3  
4  
5  
6  
7  
8  
9  
10  
11  
12  
13  
14  
15  
16  
17  
18  
19  
20  
21  
22  
23  
24  
25  
26  
27  
28  
29  
30  
31  
32  
33  
34  
35  
36  
37  
38  
39  
40  
41  
42  
43  
44  
45  
46  
47  
48  
49  
50  
51  
52  
53  
54  
55  
56  
57  
58  
59  
60

1     **The effect of resveratrol supplementation on the expression levels of**  
2     **factors associated with cellular senescence and sCD163/sTWEAK ratio**  
3     **in patients with type 2 diabetes mellitus: study protocol for a double-**  
4             **blind controlled randomized clinical trial**

6     Shima Abdollahi<sup>1,2,7</sup>, Amin Salehi-Abargouei<sup>1,2</sup>, Mahtab Tabatabaie<sup>1,2</sup>, Mohammad  
7     Hasan Sheikhha<sup>3,4</sup>, Hossein Fallahzadeh<sup>5</sup>, Masoud Rahmanian<sup>6</sup>, Omid Toupchian<sup>7</sup>,  
8     Elham Karimi-Nazari<sup>1,8</sup>, Hassan Mozaffari-Khosravi<sup>1,2\*</sup>

10    <sup>1</sup>Nutrition and Food Security Research Center, Shahid Sadoughi University of Medical  
11    Sciences, Yazd, Iran.

12    <sup>2</sup>Department of Nutrition, School of Public Health, Shahid Sadoughi University of  
13    Medical Sciences, Yazd, Iran.

14    <sup>3</sup>Department of Genetics, Faculty of Medicine, Shahid Sadoughi University of Medical  
15    Sciences, Yazd, Iran.

16    <sup>4</sup>Yazd Clinical and Research Center for Infertility, Shahid Sadoughi University of  
17    Medical Sciences, Yazd, Iran.

18    <sup>5</sup>Department of Biostatistics and Epidemiology, Research Center of Prevention and  
19    Epidemiology of Non-Communicable Disease, School of Health, Shahid Sadoughi  
20    University of Medical Sciences, Yazd, Iran.

21    <sup>6</sup>Yazd Diabetic Research Center, Shahid Sadoughi University of Medical Sciences,  
22    Yazd, Iran.

23    <sup>7</sup> Department of Nutrition and Public Health, School of Public Health, North Khorasan  
24    University of Medical Sciences, Bojnurd, Iran.

25    <sup>8</sup>Biological Sciences and Technology Institute, Malek Ashtar University of Technology,  
26    Tehran, Iran.

1  
2 28 Address all correspondence and requests for reprints to: Hassan Mozaffari-Khosravi,  
3  
4 29 Nutrition and Food Security Research Center, Shahid Sadoughi University of Medical  
5  
6 30 Sciences, Yazd, Iran and Department of Nutrition, School of Public Health, Shahid  
7  
8 31 Sadoughi University of Medical Sciences, Yazd, Iran.

9  
10  
11 32 E-mail: [dr.mozaffarihasan@gmail.com](mailto:dr.mozaffarihasan@gmail.com)

12  
13 33 Tel: (9835)38209143

14  
15  
16 34 Email addresses:

17  
18 35 Shima Abdollahi: [sh.abd6864@yahoo.com](mailto:sh.abd6864@yahoo.com)

19  
20 36 Amin Salehi-Abargouei: [abargouei@gmail.com](mailto:abargouei@gmail.com)

21  
22 37 Mahtab Tabatabaie: [mahtab.tabatabaie.fb@gmail.com](mailto:mahtab.tabatabaie.fb@gmail.com)

23  
24 38 Mohammad Hasan Sheikhha: [sheikhha@yahoo.com](mailto:sheikhha@yahoo.com)

25  
26 39 Hossein Fallahzadeh: [fallahzadeh.ho@gmail.com](mailto:fallahzadeh.ho@gmail.com)

27  
28 40 Masoud Rahmanian: [drmasoudrahmanian@yahoo.com](mailto:drmasoudrahmanian@yahoo.com)

29  
30 41 Omid Toupchian: [o.toupchian@gmail.com](mailto:o.toupchian@gmail.com)

31  
32 42 Elham Karimi-Nazari: [elham939k@gmail.com](mailto:elham939k@gmail.com)

33  
34 43 Hassan Mozaffari-Khosravi: [dr.mozaffarihasan@gmail.com](mailto:dr.mozaffarihasan@gmail.com)

35  
36 44

37  
38 45

39  
40 46

41  
42 47

43  
44 48

45  
46 49

47  
48 50

49  
50 51

51  
52 52

**ABSTRACT**

**Introduction:** Over the past decades, the number of people with type 2 diabetes (T2D) has increased, globally. One of the major complications in these patients is cardiovascular disease; it seems that the cell proliferation inhibition can improve vascular function in these patients. It is proposed that peroxisome proliferator activated receptor alpha (PPAR $\alpha$ ), can induce cell cycle arrest via cyclin-dependent kinase inhibitor 2A (p16) activation. Also, it has been shown that phosphorylated tumor suppressor protein p53 is involved in cell senescence by cyclin-dependent kinase inhibitor 1 (p21) upregulation. Resveratrol is a natural polyphenol and appears to improve the vascular function through the mentioned pathways. We will aim to evaluate the effects of resveratrol supplementation on mRNA expression of PPAR $\alpha$ , p53, p21 and p16 in patients with T2D. We will also measure serum levels of cluster of differentiation 163 (CD163) and TNF-like weak inducer of apoptosis (TWEAK) as the indicators of cardiovascular status.

**Methods and Analysis:** Seventy-two subjects suffering from T2D will participate in this double blind randomized parallel placebo-controlled clinical trial. Participants will be randomly assigned to receive 1000 mg/day trans-resveratrol or placebo (methyl cellulose) for 8 weeks. The mRNA expression levels of PPAR $\alpha$ , p53, p21 and p16 genes will be assessed using real-time polymerase chain reaction (PCR) and serum CD163 and TWEAK levels will be measured using commercially available ELISA kits at baseline and the end of the study. Clinical outcomes parameters (glycemic and lipid profiles and body composition) will also be measured before and after study duration.

**Ethics and dissemination:** The study is performed in agreement with the Declaration of Helsinki and is approved by the Ethics Committee of the Shahid Sadoughi University of Medical Sciences (no: ir.ssu.sph.rec.1396.120). The results will be published in scientific journals.

Trial registration number: IRCT20171118037528N1, Registered 29 December 2017)

1  
2 79 **Keywords:** *Type 2 diabetes mellitus, Cardiovascular Diseases, Resveratrol,*  
3  
4 80 *Peroxisome Proliferator Activated Receptors, p53, p16, p21, TWEAK, CD163*  
5  
6

7 81

8  
9 82 **‘Strengths and limitations of this study’**  
10

- 11  
12 83 • To our knowledge, this is the first human study to investigate the effects of  
13  
14 84 resveratrol supplementation on the cellular factors associated with intimal  
15  
16 85 hyperplasia through the cellular pathways.  
17  
18 86 • This study is a first trial that uses resveratrol as a natural ligand for PPAR $\alpha$ .  
19  
20 87 • The study is not designed to follow up the patients to determine the long-term  
21  
22 88 effects of resveratrol supplementation.  
23  
24  
25  
26  
27  
28  
29  
30  
31  
32  
33  
34  
35  
36  
37  
38  
39  
40  
41  
42  
43  
44  
45  
46  
47  
48  
49  
50  
51  
52  
53  
54  
55  
56  
57  
58  
59  
60

## 100 INTRODUCTION

101 With an increasing trend in its prevalence, type 2 diabetes mellitus (T2DM) has become  
102 one of the important causes of mortality and morbidity worldwide (1-3). Uncontrolled  
103 T2DM might lead to a broad range of micro- and macro-vascular complications such as  
104 vascular dysfunction and cardiovascular disease (CVD) (4-6). Atherosclerosis is one of  
105 the most important causes of CVD which leads to intimal hyperplasia (IH) (4). IH is a  
106 cardinal manifestation of atherosclerosis which is associated with CVD and recently, it  
107 has been suggested to be added to the Framingham risk factors (7). In addition, IH might  
108 lead to restenosis after percutaneous transluminal angioplasty or vascular graft and it is  
109 known as one of the major complications during the treatment of CVD (8-10).  
110 Proliferation of vascular smooth muscle cells (VSMCs) is increased during IH and is in  
111 accordance with vascular stenosis and heart attack (11). Recent animal studies indicated  
112 that the VSMCs' proliferation inhibition through cell cycle arrest can reduce the IH levels  
113 (12, 13).

114 Some cellular studies suggest that peroxisome proliferator activated receptors (PPARs)  
115 also play a key role in VSMCs' proliferation (14, 15). PPARs are a group of nuclear  
116 receptors with various isoforms, including  $\alpha$ ,  $\beta/\delta$  and  $\gamma$  that are involved in transcription  
117 regulation of a broad range of genes (16, 17). PPAR $\alpha$  is one of the members of this family  
118 and has a critical role in the regulation of genes involved in fatty acid oxidation, glucose  
119 metabolism, vascular function, obesity, cell proliferation, plaque stability and  
120 inflammation (18, 19). Some bodies of evidence showed that PPAR $\alpha$  activation might  
121 arrest the cell cycle progression in G<sub>1</sub>/S phase through induction of the p16INK4a (6, 20).  
122 Cyclin-dependent kinase inhibitor 2A, which is also known as p16INK4a, is a tumor  
123 suppressor that inhibits CDK4-mediated phosphorylation of retinoblastoma and inhibits  
124 induction of E2F-dependent genes and therefore suppresses cell cycle progression (21-  
125 23).



1  
2 126 Resveratrol (3,5,4'-trihydroxy-trans-stilbene), which is structurally known as stilbenoid  
3  
4 127 and phytoalexin, is a type of natural polyphenol found mostly in red grapes; it has been  
5  
6 128 introduced as a ligand of PPAR $\alpha$  and it seems to stimulate cellular senescence via the  
7  
8  
9 129 above mentioned pathways (24-26). It has also been proposed that resveratrol has the  
10  
11 130 potential to activate p53, another important tumor suppressor, by phosphorylating the  
12  
13 131 serine residue in p53 protein through extracellular kinases (27, 28). Phosphorylated p53  
14  
15  
16 132 is proposed to be able to upregulate the cyclin-dependent kinase inhibitor 1 (p21) gene,  
17  
18 133 thereby inhibiting CDK2 activity and induces the cell cycle arrest in S to G2 phase (29,  
19  
20 134 30). Animal studies indicated that p53 plays a key role in decreasing the intimal thickness  
21  
22  
23 135 (31-34).

24  
25 136 Insulin resistance induces chronic inflammation via increased macrophage activity and  
26  
27 137 overexpression of pro-inflammatory cytokines (35). TNF-related weak inducer of  
28  
29 138 apoptosis (TWEAK) is a member of TNF superfamily which is mainly produced by  
30  
31 139 macrophages and is released into the circulation in its soluble form (sTWEAK) (36).  
32  
33  
34 140 Studies have shown that sTWEAK levels are reduced in T1DM, T2DM as well as in the  
35  
36 141 presence of CVD risk factors (37-39). The main cause of reduced sTWEAK levels is its  
37  
38 142 binding to fibroblast growth factor-inducible 14 (Fn14) receptor, which therefore can  
39  
40  
41 143 result in inflammatory responses (40).

42  
43 144 Intraplaque hemorrhage-common feature of atherosclerotic plaques- is prevalent in  
44  
45 145 patients with T2DM (41, 42). Studies have shown that intraplaque hemorrhage is most  
46  
47 146 likely to occur in unstable plaques and is associated with ischemic stroke (43-45). On the  
48  
49 147 other hand, cluster of differentiation 163 (CD163) is a macrophage scavenger receptor  
50  
51 148 that is involved in the uptake of hemoglobin-haptoglobin complexes and is also known  
52  
53 149 as a scavenger of sTWEAK (46, 47); sCD163 is the soluble form of this receptor and it  
54  
55 150 has been proposed that sCD163/sTWEAK ratio can be used as an indicator of the severity  
56  
57 151 and progression of vascular diseases (37, 48, 49). Resveratrol, as an antioxidant, can

1  
2 152 reduce inflammatory responses and macrophages activity (50) and thus, it seems that  
3  
4 153 resveratrol might affect sCD163/sTWEAK ratio in patients with T2DM. Given that no  
5  
6 154 study has investigated this issue, this has prompted us to design a randomized clinical  
7  
8  
9 155 trial (RCT) with the following objectives:

- 10  
11 156 i. To investigate the effect of resveratrol supplementation on the changes in  
12  
13 157 PPAR $\alpha$ , p16, p53 and p21 gene expression as well as serum levels of sCD163  
14  
15 158 and sTWEAK in patients with T2DM.  
16  
17  
18 159 ii. To compare the changes in serum levels of lipid profile, including  
19  
20 160 triglyceride, total cholesterol, high density lipoprotein cholesterol (HDL-C)  
21  
22 161 and low density lipoprotein cholesterol (LDL-C) as well as glycemic control  
23  
24 162 indices including fasting blood sugar (FBS), fasting insulin, glycosylated  
25  
26 163 hemoglobin (HbA1c), pancreatic beta cell function and atherogenic index of  
27  
28 164 plasma between the intervention and control groups.  
29  
30  
31  
32 165

## 33 34 166 **METHODS AND ANALYSIS**

### 35 36 37 167 **Study design**

38  
39  
40 168 We designed a double-blind, randomized parallel placebo-controlled clinical trial among  
41  
42 169 patients with T2DM; we will randomly assign patients to receive either 1000 mg  
43  
44 170 resveratrol or placebo in a daily manner for two months. This monocentral study will be  
45  
46 171 conducted in Diabetes Clinic Center in Yazd, Iran. The overall overview of the study is  
47  
48 172 presented in **Figure 1**. Any methodological changes in the study design or sample size,  
49  
50 173 which may potentially affect the patients' safety or study procedures, will be discussed  
51  
52 174 in the committee of ethics before implementation.  
53  
54  
55  
56  
57 175

### 58 59 176 **Randomization**

60

1  
2 177 The present study will be an 8-week double-blind parallel RCT; patients will be  
3  
4 178 randomized 1:1 according to the method of stratified block randomization based on sex  
5  
6  
7 179 (male and female) and age (30-45 and 45-60 years).

8  
9 180 Computer-generated random numbers will be used to randomly allocate eligible  
10  
11 181 participants into the one of the two trial groups by an independent statistician.  
12  
13 182 Participants will be allocated to one of the two arms, using sealed envelope by a  
14  
15  
16 183 researcher who will not be involved in participant's enrollment (EKN) and assignment  
17  
18 184 of intervention will be carried out by principal investigator (SA) who will be blinded to  
19  
20 185 allocation. Resveratrol supplements and placebo will be provided in the same shape,  
21  
22 186 color and appearance and will be packed in the same bottles and a person, who is not  
23  
24 187 involved in this project, will label the containers as A or B. Participants and  
25  
26  
27 188 administrator will be unaware about the content of the bottles until data analyses.  
28  
29  
30 189

### 31 32 190 **Eligibility criteria**

33  
34 191 Thirty to sixty-year-old male and female, who have been diagnosed with established  
35  
36 192 T2DM for at least three months prior to the intervention and are taking medication for  
37  
38 193 diabetes, will be invited to participate in the study. Participants with the following  
39  
40 194 criteria will be excluded: 1) diagnosis of any liver, kidney, cancer and Alzheimer's  
41  
42 195 diseases or gastrointestinal ulcer; 2) pregnancy or lactation; 3) insulin therapy or the  
43  
44 196 HbA1c levels at or above 8% at any point of study; 4) consumption of supplements  
45  
46 197 containing fish oil, vitamin E or C in the previous six months; 5) a history of allergic  
47  
48 198 reaction to grapes; 6) consumption of anticoagulants, fibrates and anti-inflammatory  
49  
50 199 agents; 7) a history of myocardial infarction or the presence of stent or battery in  
51  
52 200 patients's heart, and 8) consumption of red wine or supplements containing resveratrol  
53  
54 201 in 6 months prior to intervention.  
55  
56  
57  
58  
59  
60

## 203 **Sample size**

204 Sample size is calculated based on a previous human study regarding the PPAR $\alpha$   
205 expression in peripheral blood mononuclear cells (PBMCs) as the primary variable  
206 (51). The participant numbers needed in each group is calculated using a proposed  
207 formula for parallel clinical trials by considering  $\alpha=0.05$  and a power of 80% (52).  
208 Assuming a 20% of dropout rate, the final sample size is set to be 36 participants in  
209 each group.

## 211 **Intervention**

212 Recruitment of participants will take place through installing announcements at Diabetes  
213 Clinic Center in Yazd, Iran. Interested patients will be invited to a screening session and  
214 two trained researchers (SA and MT) will introduce the study protocol to them and assess  
215 eligibility criteria. Written consent form will be obtained from all eligible patients who  
216 will decide to participate in the study. Participants will also receive information sheets.  
217 Blood sample will be also obtained to assess HbA1c and eligible patients will be included  
218 in the study. It should be mentioned that; ineligible patients will be excluded from the  
219 study after receiving nutrition recommendations for diabetes.

220 General information including age, parity, education, medical information, duration of  
221 the disease, etc. will be recorded through interviews at the beginning of the study. In  
222 order to obtain the physical activity level, metabolic equivalents (METs) will be  
223 calculated through a questionnaire at the beginning and the end of the study (53). To  
224 assess the dietary intakes, participants will be asked to complete a three-dietary record  
225 form (two weekdays and one weekend day), one at the first week and another at the last  
226 week of the intervention; collected data will be analyzed using Nutritionist IV software  
227 (The Hearst Corporation, San Bruno, CA). The questionnaires will be reviewed and

1  
2 228 approved by the ethical committee members. All the study related data will be stored  
3  
4 229 confidentially.  
5  
6 230 Participants in the intervention group will take two capsules of resveratrol per day (one  
7  
8 231 at breakfast and another at dinner) and individuals in the placebo group will take two  
9  
10 232 capsules of 500 mg methylcellulose per day, at the same time for 8 weeks; each capsule  
11  
12 233 of resveratrol contains 500 mg of 99.71% micronized trans-resveratrol (particle size:  
13  
14 234 <1.9  $\mu\text{m}$ ) which provides 495 mg trans-resveratrol without any inactive ingredients,  
15  
16 235 fillers, additives or preservatives (Mega-Resveratrol, USA). Moreover, participants will  
17  
18 236 continue taking diabetic medication prescribed by doctor during the study. Each bottle  
19  
20 237 contains 60 capsules (providing supplement for one month). All participants will be  
21  
22 238 requested to bring back the first bottle after first month and then they will be given the  
23  
24 239 second bottle. At the end of the study, if the remaining capsules of every patient exceed  
25  
26 240 10% of the total administered capsules (12 capsules), that patient will be categorized as  
27  
28 241 non-adherent. There will be some advices for enhancing the participant's compliance  
29  
30 242 such as taking capsules with meals. Moreover, patients who complete the intervention  
31  
32 243 will have an 8-hour nutrition education program for free. All randomized patients,  
33  
34 244 including those who will complete the study or those who will not complete due to any  
35  
36 245 reasons, will follow the same schedule.  
37  
38 246 Any possible adverse event will be reported to the medical ethics committee within a  
39  
40 247 week and Shahid Sadoughi University of Medical Sciences will be responsible for any  
41  
42 248 participation related problems. Some of the participants may withdraw from the study  
43  
44 249 for any reason at any time, before or after signing the consent form; the investigator  
45  
46 250 may also terminate an individual's participation in the study in order to keep the safety  
47  
48 251 and protect the participant from excessive risks and/or to maintain the integrity of data  
49  
50 252 due to the improper follow-up of the procedures by participant.  
51  
52  
53  
54  
55  
56  
57  
58  
59  
60 253

1  
2 254 **Data collection**

3  
4 255 *Anthropometric measurements*

5  
6  
7 256 Anthropometric parameters will be taken at the beginning and end of the intervention by  
8  
9 257 the same person. Height will be measured using a stadiometer (Seca, Hamburg, Germany)  
10  
11 258 with an accuracy level of 0.5 cm; waist and hip circumferences will be measured to the  
12  
13 259 nearest 0.5 cm according to the standard methods, using a flexible tape (54). Weight  
14  
15 260 estimate and body composition analysis (% fat mass, % fat free mass and visceral fat)  
16  
17 261 will be performed via InBody (USA) analyzer, with light clothing before and after the  
18  
19 262 intervention. Body mass index (BMI) will be calculated by dividing body weight (kg) by  
20  
21 263 the height squared ( $m^2$ ), waist-to-hip-ratio (WHR) and waist-to-height ratio (WHtR) will  
22  
23 264 be calculated via standard equations (6).  
24  
25  
26  
27

28 265  
29  
30 266 *Biochemical measurements*

31  
32  
33 267 After 12 hours of fasting, 10 ml of venous blood will be taken at baseline and week 8 of  
34  
35 268 the study. A 6 ml of blood sample will be collected in the clot-activator tubes and  
36  
37 269 centrifuged after 30 minutes clotting time (3000 g, 10 minutes at room temperature;  
38  
39 270 Eppendorf AG, Hamburg, Germany) for serum isolation. Serum samples will be stored  
40  
41 271 at  $-70^{\circ}C$  until analyses. Remaining blood will be obtained in two EDTA-coated tubes for  
42  
43 272 gene expression and HbA1c assessment, separately. Biochemical analyses including  
44  
45 273 fasting blood glucose, total cholesterol, triglycerides, HDL-C and LDL-C will be  
46  
47 274 measured using automated enzymatic methods and commercial kits (Pars Azmoon,  
48  
49 275 Tehran, Iran). Laboratory kits will be used to assess circulating insulin levels and the  
50  
51 276 percent of HbA1c will be assessed by enzyme-linked immunosorbent assay (ELISA,  
52  
53 277 Monobind, USA) and high pressure liquid chromatography (HPLC, Pars Azmoon,  
54  
55 278 Tehran, Iran), respectively. Commercially available ELISA kits will be used for  
56  
57  
58  
59  
60

1  
2 279 estimating serum levels of sCD163 and sTWEAK. Homeostatic model assessment of  
3  
4 280 insulin resistance (HOMA-IR), quantitative insulin sensitivity check index (QUICKI) as  
5  
6 281 an insulin sensitivity index and homeostasis model assessment of beta-cell function  
7  
8 282 (HOMA-B) as well as atherogenic index will be calculated using the suggested formulas  
9  
10 283 (55, 56). All laboratory data will be identified by an identification number to maintain  
11  
12 284 the confidentiality of participants.  
13  
14  
15

16 285

### 17 18 286 *Gene expression assay*

19  
20  
21 287 Total RNA will be extracted directly from whole blood using GeneAll Hybrid-R  
22  
23 288 purification kit protocol (GeneAll Biotechnology Co., Seoul, South Korea). The quality  
24  
25 289 and purity (260/280 nm ratio between 1.8 to 2.2) of the RNA will be checked using  
26  
27 290 spectrophotometer (NanoDrop, Thermo Scientific, USA). After normalization, high  
28  
29 291 quality mRNA will be reverse transcribed to cDNA by cDNA synthesis kit (GeneAll  
30  
31 292 Biotechnology Co., Seoul, South Korea) and according to the manufacturer's  
32  
33 293 instruction. Three primer designing tools (Primer Blast, Oligocalc, and Gene runner  
34  
35 294 5.0.99) are applied for sequencing the study primers (**Table 1**). Real-time polymerase  
36  
37 295 chain reaction (PCR) and SYBR Green method (Takara Bio Inc., Japan) will be applied  
38  
39 296 to assess the mRNA expression levels of PPAR $\alpha$ , p53, p21 and p16 in the StepOne  
40  
41 297 system (Applied Biosystems, Foster City, California, USA). To this aim, 1  $\mu$ L of  
42  
43 298 cDNA, 10  $\mu$ L of SYBR Green, 1  $\mu$ L of primers (revers and forward) and 0.4  $\mu$ L of  
44  
45 299 Rox, will be mixed together. Final volume of solution will be reached to 20  $\mu$ L by  
46  
47 300 adding ddH<sub>2</sub>O (7/6  $\mu$ L). Real-time PCR will be adjusted for initial denaturation step at  
48  
49 301 95 °C for 10 minutes, followed by 40 cycles of 90 °C for 15 seconds. The optimal  
50  
51 302 annealing temperature for primers will be set at a range of 55-60 °C for 20 seconds. The  
52  
53 303 final step will be set-up at 72 °C for 20 seconds, for primer extension. Glyceraldehyde  
54  
55 304 phosphate dehydrogenase (GAPDH) will be the housekeeping gene in real-time PCR  
56  
57  
58  
59  
60

1  
2 305 assessments. Real-time PCR efficacy and changes in expression levels will be tested  
3  
4 306 using LinRegPCR software (57) and Pfaffl equation, respectively (58).  
5  
6  
7 307  
8  
9

### 10 308 **Statistical analysis**

11  
12 309 Principal researchers will have full access to the final data sets. Data entry and statistical  
13  
14 310 analyses will be performed using SPSS for Windows (SPSS, Chicago, IL, USA), version  
15  
16 311 23.0. The intervention and the control arms will be compared with each other for primary  
17  
18 312 analysis. One-sample Kolmogorov-Smirnov test will be conducted to check normal  
19  
20 313 distribution of data. Continuous variable will be expressed as means  $\pm$  SD or median and  
21  
22 314 interquartile range and categorical data will be presented as number and percentages in  
23  
24 315 study groups. Independent sample t-test will be carried out for comparing parametric  
25  
26 316 continuous data and Mann-Whitney U test will be used to test the differences in  
27  
28 317 asymmetric variables between the two groups. Pearson's correlation coefficient will be  
29  
30 318 applied to show the correlation between biochemical and anthropometric indices. General  
31  
32 319 linear models will be used to assess the effects of resveratrol relative to placebo after  
33  
34 320 adjustment for baseline values and participant's characteristics. P-value  $\leq 0.05$  will be  
35  
36 321 defined as statistically significance for all tests.  
37  
38  
39  
40  
41

42 322 Data analysis will be performed on two sets including the intention-to-treat (ITT) and the  
43  
44 323 "per protocol" analysis; ITT analysis considers all patients in the intervention or control  
45  
46 324 groups as originally allocated by randomization, independently of their actual adherence  
47  
48 325 to the determined treatment and it ignores anything that happens after randomization  
49  
50 326 including misallocation, noncompliance, withdrawal or protocol deviations. In the case  
51  
52 327 that researchers observe a significant difference between those who will be allocated to  
53  
54 328 receive the intervention and those who will actually adhere to the intervention, additional  
55  
56  
57  
58  
59  
60



1  
2 329 analysis will be performed considering the actual adherence to the treatment (per protocol  
3  
4 330 analysis). The results of the two mentioned analyses will be compared with each other.  
5  
6  
7 331

### 9 332 **Strengths and limitations**

11 333 This study has been designed as a double-blind randomized controlled clinical trial,  
12  
13 334 which will investigate the effects of resveratrol supplementation on the cellular factors  
14  
15 335 associated with intimal hyperplasia for the first time. It will also be the first to use high-  
16  
17 336 bioavailable resveratrol supplement as a natural ligand for PPAR $\alpha$  in human. However,  
18  
19 337 as a limitation, the labeling of the containers as A and B can result in unblinding entire  
20  
21 338 group when unblinding is necessary; although, resveratrol has not shown serious  
22  
23 339 adverse events in previous studies. Another limitation in this study is the surrogate  
24  
25 340 markers that will be used for endothelial function assessment instead of gold-standard  
26  
27 341 methods such as flow-mediated dilation (FMD) or peripheral arterial tonometry (PAT).  
28  
29 342 Moreover, we will not perform oral glucose tolerance test (OGTT) or hyperinsulinemic  
30  
31 343 clamp to evaluate glycemic control effects of resveratrol. Finally, this study is designed  
32  
33 344 for short term assessment of resveratrol supplementation effects in patients with T2DM.  
34  
35  
36  
37  
38  
39  
40

### 41 346 **Patient and public involvement**

43 347 Patients or the public will not involve in the setting of the research question, outcome  
44  
45 348 measures or study design and implementation. In this study, the intervention will  
46  
47 349 involve taking daily supplement, and participants will not receive any lifestyle changes,  
48  
49 350 so, participants will not be asked to assess the benefits and burdens of participating. The  
50  
51 351 summary results of the trial will be presented in a grouped form to scientific journals.  
52  
53 352 Participants will be provided individual body composition report, as well as individual  
54  
55 353 glycemic and lipid profile results, on request, when study is completed.  
56  
57  
58  
59  
60

354

1  
2 355 **Ethical consideration**  
3

4 356 Written consent form will be obtained from all patients before the study initiation. This  
5  
6  
7 357 protocol is approved by the Ethics Committee of the Shahid Sadoughi University of  
8  
9 358 Medical Sciences (no: ir.ssu.sph.rec.1396.120). This study is registered at the Iranian  
10  
11 359 Registry of Clinical Trials (IRCT20171118037528N1).  
12

13  
14 360

15  
16 361 **Acknowledgments**  
17

18 362 The authors of this manuscript acknowledge Shahid Sadoughi university of medical  
19  
20 363 sciences, Yazd Diabetes Research Center and Iran's National Science Foundation  
21  
22 364 (INSF).  
23  
24

25 365

26  
27  
28 366 **Competing interests statement**  
29

30  
31 367 Part of the cost of this study will be borne by INSF. The funding body had no role in the  
32  
33 368 design of the study or in the writing of this manuscript or decision to submit the  
34  
35 369 manuscript for publication. They will also have no role in any aspect of the described  
36  
37 370 data management, analysis or the reporting of study results. The authors declare that  
38  
39 371 they have no competing interests.  
40  
41

42  
43 372

44  
45  
46 373 **Funding**  
47

48  
49 374 This study is a PhD thesis and is supported by Shahid Sadoughi University of Medical  
50  
51 375 Sciences. This work is externally supported by INSF grant and was reviewed by their  
52  
53 376 scientific committee before the funding was approved (grant no: 96010660).  
54  
55

56 377

57  
58 378 **Authors' contributions**  
59  
60

1  
2 379 SA, ASA, OT, MHS, MR and HMK were involved in initial idea of this study and  
3  
4 380 designing the trial. SA, ASA and HMK were contributed in writing the manuscript and  
5  
6 381 getting grant. MT and EKN are co-investigator and will involve in collecting data,  
7  
8  
9 382 concealment procedure and counseling patients. HF provided statistical expertise in  
10  
11 383 clinical trial design, sample size calculation and blinding. MHS and EKN were  
12  
13 384 contributed to design of biochemical procedures. All authors read and approved the  
14  
15  
16 385 final manuscript.  
17  
18  
19  
20  
21 386

### 22 387 **List of abbreviations**

23 388 PPAR $\alpha$ , peroxisome proliferator activated receptor alpha; p21, cyclin-dependent kinase  
24  
25 389 inhibitor 1; p16, cyclin-dependent kinase inhibitor 2A; CD163, cluster of differentiation  
26  
27 390 163; TWEAK, TNF-like weak inducer of apoptosis; BMI, Body mass index; GAPDH,  
28  
29 391 glyceraldehyde phosphate dehydrogenase; WHtR, waist-to-height ratio; WHR, waist-to  
30  
31 392 hip-ratio; ELISA, enzyme-linked immunosorbent assay; HPLC, high pressure liquid  
32  
33 393 chromatography; METs, metabolic equivalents; HDL, high density lipoprotein; LDL,  
34  
35 394 low density lipoprotein; FBS, fasting blood sugar; HbA1c, glycosylated hemoglobin;  
36  
37 395 T2DM, type 2 diabetes mellitus; CVD, cardiovascular disease; ITT, intention-to-treat.  
38  
39  
40  
41  
42 396  
43  
44  
45 397  
46  
47 398  
48  
49 399  
50  
51 400  
52  
53 401  
54  
55 402  
56  
57 403  
58  
59 404  
60 405

**References:**

1. Fowler MJ. Diabetes: Magnitude and mechanisms. *Clinical Diabetes*. 2007;25(1):25-8.
2. Chen L, Magliano DJ, Zimmet PZ. The worldwide epidemiology of type 2 diabetes mellitus—present and future perspectives. *Nature Reviews Endocrinology*. 2012;8(4):228-36.
3. Whiting DR, Guariguata L, Weil C, Shaw J. IDF diabetes atlas: global estimates of the prevalence of diabetes for 2011 and 2030. *Diabetes research and clinical practice*. 2011;94(3):311-21.
4. Fowler MJ. Microvascular and macrovascular complications of diabetes. *Clinical diabetes*. 2008;26(2):77-82.
5. Collaboration ERF. Diabetes mellitus, fasting blood glucose concentration, and risk of vascular disease: a collaborative meta-analysis of 102 prospective studies. *The Lancet*. 2010;375(9733):2215-22.
6. Toupchian O, Sotoudeh G, Mansoori A, Nasli-Esfahani E, Djalali M, Keshavarz SA, et al. Effects of DHA-enriched fish oil on monocyte/macrophage activation marker sCD163, asymmetric dimethyl arginine, and insulin resistance in type 2 diabetic patients. *Journal of clinical lipidology*. 2016;10(4):798-807.
7. Polak JF, Pencina MJ, Pencina KM, O'donnell CJ, Wolf PA, D'Agostino Sr RB. Carotid-wall intima-media thickness and cardiovascular events. *New England Journal of Medicine*. 2011;365(3):213-21.
8. Dzau VJ, Braun-Dullaeus RC, Sedding DG. Vascular proliferation and atherosclerosis: new perspectives and therapeutic strategies. *Nature medicine*. 2002;8(11):1249-56.
9. Orr AW, Hastings NE, Blackman BR, Wamhoff BR. Complex regulation and function of the inflammatory smooth muscle cell phenotype in atherosclerosis. *Journal of vascular research*. 2010;47(2):168-80.
10. Yu H, Payne TJ, Mohanty DK. Effects of Slow, Sustained, and Rate-Tunable Nitric Oxide Donors on Human Aortic Smooth Muscle Cells Proliferation. *Chemical biology & drug design*. 2011;78(4):527-34.
11. Wright RS, Anderson JL, Adams CD, Bridges CR, Casey DE, Ettinger SM, et al. 2011 ACCF/AHA focused update incorporated into the ACC/AHA 2007 guidelines for the management of patients with unstable angina/non-ST-elevation myocardial infarction: a report of the American College of Cardiology Foundation/American Heart Association Task Force on Practice Guidelines. *Journal of the American College of Cardiology*. 2011;57(19):e215-e367.
12. Wang Z, Zhang X, Chen S, Wang D, Wu J, Liang T, et al. Lithium chloride inhibits vascular smooth muscle cell proliferation and migration and alleviates injury-induced neointimal hyperplasia via induction of PGC-1 $\alpha$ . *PloS one*. 2013;8(1):e55471.
13. Won KJ, Jung SH, Lee C-K, Na HR, Lee KP, Lee D-Y, et al. DJ-1/park7 protects against neointimal formation via the inhibition of vascular smooth muscle cell growth. *Cardiovascular research*. 2012;97(3):553-61.

- 1  
2 457 14. Gizard F, Amant C, Barbier O, Bellosta S, Robillard R, Percevault F, et al. PPAR alpha  
3 458 inhibits vascular smooth muscle cell proliferation underlying intimal hyperplasia by inducing  
4 459 the tumor suppressor p16INK4a. *The Journal of clinical investigation*. 2005;115(11):3228-38.  
5 460  
6 461 15. Gizard F, Nomiya T, Zhao Y, Findeisen HM, Heywood EB, Jones KL, et al. The  
7 462 PPAR $\alpha$ /p16INK4a pathway inhibits vascular smooth muscle cell proliferation by repressing  
8 463 cell cycle-dependent telomerase activation. *Circulation research*. 2008;103(10):1155-63.  
9 464  
10 465 16. Issemann I, Green S. Activation of a member of the steroid hormone receptor  
11 466 superfamily by peroxisome proliferators. *Nature*. 1990;347(6294):645-50.  
12 467  
13 468 17. Kota BP, Huang TH-W, Roufogalis BD. An overview on biological mechanisms of PPARs.  
14 469 *Pharmacological Research*. 2005;51(2):85-94.  
15 470  
16 471 18. Chinetti-Gbaguidi G, Fruchart J-C, Staels B. Role of the PPAR family of nuclear  
17 472 receptors in the regulation of metabolic and cardiovascular homeostasis: new approaches to  
18 473 therapy. *Current opinion in pharmacology*. 2005;5(2):177-83.  
19 474  
20 475 19. Toupchian O, Sotoudeh G, Mansoori A, Djalali M, Keshavarz SA, Nasli-Esfahani E, et al.  
21 476 Effects of DHA Supplementation on Vascular Function, Telomerase Activity in PBMC,  
22 477 Expression of Inflammatory Cytokines, and PPAR $\gamma$ -LXR $\alpha$ -ABCA1 Pathway in Patients With Type  
23 478 2 Diabetes Mellitus: Study Protocol for Randomized Controlled Clinical Trial. *Acta Medica*  
24 479 *Iranica*. 2016;54(7):410-7.  
25 480  
26 481 20. Gizard F, Nomiya T, Zhao Y, Findeisen HM, Heywood EB, Jones KL, et al. The  
27 482 PPAR $\alpha$ /p16INK4a pathway inhibits vascular smooth muscle cell proliferation by repressing cell  
28 483 cycle-dependent telomerase activation. *Circulation research*. 2008;103(10):1155-63.  
29 484  
30 485 21. Walworth NC. Cell-cycle checkpoint kinases: checking in on the cell cycle. *Current*  
31 486 *opinion in cell biology*. 2000;12(6):697-704.  
32 487  
33 488 22. Zhang HS, Gavin M, Dahiya A, Postigo AA, Ma D, Luo RX, et al. Exit from G1 and S  
34 489 phase of the cell cycle is regulated by repressor complexes containing HDAC-Rb-hSWI/SNF and  
35 490 Rb-hSWI/SNF. *Cell*. 2000;101(1):79-89.  
36 491  
37 492 23. Gizard F, Amant C, Barbier O, Bellosta S, Robillard R, Percevault F, et al. PPAR $\alpha$  inhibits  
38 493 vascular smooth muscle cell proliferation underlying intimal hyperplasia by inducing the tumor  
39 494 suppressor p16INK4a. *Journal of Clinical Investigation*. 2005;115(11):3228.  
40 495  
41 496 24. Inoue H, Jiang X-F, Katayama T, Osada S, Umesono K, Namura S. Brain protection by  
42 497 resveratrol and fenofibrate against stroke requires peroxisome proliferator-activated receptor  
43 498  $\alpha$  in mice. *Neuroscience letters*. 2003;352(3):203-6.  
44 499  
45 500 25. Qin S, Lu Y, Rodrigues GA. Resveratrol protects RPE cells from sodium iodate by  
46 501 modulating PPAR $\alpha$  and PPAR $\delta$ . *Experimental eye research*. 2014;118:100-8.  
47 502  
48 503 26. Takizawa Y, Nakata R, Fukuhara K, Yamashita H, Kubodera H, Inoue H. The 4'-hydroxyl  
49 504 group of resveratrol is functionally important for direct activation of PPAR $\alpha$ . *PloS one*.  
50 505 2015;10(3):e0120865.  
51 506  
52 507 27. Dong Z. Molecular mechanism of the chemopreventive effect of resveratrol. *Mutation*  
53 508 *Research/Fundamental and Molecular Mechanisms of Mutagenesis*. 2003;523:145-50.

- 1  
2 509 28. She Q-B, Bode AM, Ma W-Y, Chen N-Y, Dong Z. Resveratrol-induced activation of p53  
3 510 and apoptosis is mediated by extracellular-signal-regulated protein kinases and p38 kinase.  
4 511 *Cancer research*. 2001;61(4):1604-10.  
5 512
- 6 513 29. Coppé J-P, Patil CK, Rodier F, Sun Y, Muñoz DP, Goldstein J, et al. Senescence-  
7 514 associated secretory phenotypes reveal cell-nonautonomous functions of oncogenic RAS and  
8 515 the p53 tumor suppressor. *PLoS biology*. 2008;6(12):e301.  
9 516
- 10 517 30. Cayrol C, Knibiehler M, Ducommun B. p21 binding to PCNA causes G1 and G2 cell cycle  
11 518 arrest in p53-deficient cells. *Oncogene*. 1998;16(3).  
12 519
- 13 520 31. Rosso A, Balsamo A, Gambino R, Dentelli P, Falcioni R, Cassader M, et al. p53 Mediates  
14 521 the accelerated onset of senescence of endothelial progenitor cells in diabetes. *Journal of*  
15 522 *Biological Chemistry*. 2006;281(7):4339-47.  
16 523
- 17 524 32. Guevara NV, Kim H-S, Antonova EI, Chan L. The absence of p53 accelerates  
18 525 atherosclerosis by increasing cell proliferation in vivo. *Nature medicine*. 1999;5(3).  
19 526
- 20 527 33. Tanner FC, Yang Z-Y, Duckers E, Gordon D, Nabel GJ, Nabel EG. Expression of cyclin-  
21 528 dependent kinase inhibitors in vascular disease. *Circulation research*. 1998;82(3):396-403.  
22 529
- 23 530 34. Chang MW, Barr E, Lu MM, Barton K, Leiden JM. Adenovirus-mediated over-  
24 531 expression of the cyclin/cyclin-dependent kinase inhibitor, p21 inhibits vascular smooth  
25 532 muscle cell proliferation and neointima formation in the rat carotid artery model of balloon  
26 533 angioplasty. *Journal of Clinical Investigation*. 1995;96(5):2260.  
27 534
- 28 535 35. Kern PA, Ranganathan S, Li C, Wood L, Ranganathan G. Adipose tissue tumor necrosis  
29 536 factor and interleukin-6 expression in human obesity and insulin resistance. *American Journal*  
30 537 *of Physiology-Endocrinology And Metabolism*. 2001;280(5):E745-E51.  
31 538
- 32 539 36. Chicheportiche Y, Bourdon PR, Xu H, Hsu Y-M, Scott H, Hession C, et al. TWEAK, a new  
33 540 secreted ligand in the tumor necrosis factor family that weakly induces apoptosis. *Journal of*  
34 541 *Biological Chemistry*. 1997;272(51):32401-10.  
35 542
- 36 543 37. Llauro G, Gonzalez-Clemente J-M, Maymo-Masip E, Subías D, Vendrell J, Chacon  
37 544 MR. Serum levels of TWEAK and scavenger receptor CD163 in type 1 diabetes mellitus:  
38 545 relationship with cardiovascular risk factors. a case-control study. *PLoS one*. 2012;7(8):e43919.  
39 546
- 40 547 38. Kralisch S, Ziegelmeier M, Bachmann A, Seeger J, Lössner U, Blüher M, et al. Serum  
41 548 levels of the atherosclerosis biomarker sTWEAK are decreased in type 2 diabetes and end-  
42 549 stage renal disease. *Atherosclerosis*. 2008;199(2):440-4.  
43 550
- 44 551 39. Díaz-López A, Chacón MR, Bulló M, Maymó-Masip E, Martínez-González MA, Estruch  
45 552 R, et al. Serum sTWEAK concentrations and risk of developing type 2 diabetes in a high  
46 553 cardiovascular risk population: a nested case-control study. *The Journal of Clinical*  
47 554 *Endocrinology & Metabolism*. 2013;98(8):3482-90.  
48 555
- 49 556 40. Wiley SR, Winkles JA. TWEAK, a member of the TNF superfamily, is a multifunctional  
50 557 cytokine that binds the TweakR/Fn14 receptor. *Cytokine & growth factor reviews*.  
51 558 2003;14(3):241-9.  
52 559
- 53 560 41. Levy A, Moreno P. Intraplaque hemorrhage. *Current molecular medicine*.  
54 561 2006;6(5):479-88.

- 1  
2 562 42. Virmani R, Kolodgie FD, Burke AP, Finn AV, Gold HK, Tulenko TN, et al. Atherosclerotic  
3 563 plaque progression and vulnerability to rupture. *Arteriosclerosis, thrombosis, and vascular*  
4 564 *biology*. 2005;25(10):2054-61.  
5 565
- 6 566 43. Kockx MM, Cromheeke KM, Knaapen MW, Bosmans JM, De Meyer GR, Herman AG, et  
7 567 al. Phagocytosis and macrophage activation associated with hemorrhagic microvessels in  
8 568 human atherosclerosis. *Arteriosclerosis, thrombosis, and vascular biology*. 2003;23(3):440-6.  
9 569
- 10 570 44. Singh N, Moody AR, Gladstone DJ, Leung G, Ravikumar R, Zhan J, et al. Moderate  
11 571 carotid artery stenosis: MR imaging–depicted intraplaque hemorrhage predicts risk of  
12 572 cerebrovascular ischemic events in asymptomatic men. *Radiology*. 2009;252(2):502-8.  
13 573
- 14 574 45. Takaya N, Yuan C, Chu B, Saam T, Underhill H, Cai J, et al. Association between carotid  
15 575 plaque characteristics and subsequent ischemic cerebrovascular events. *Stroke*.  
16 576 2006;37(3):818-23.  
17 577
- 18 578 46. Fabrick BO, Dijkstra CD, van den Berg TK. The macrophage scavenger receptor CD163.  
19 579 *Immunobiology*. 2005;210(2):153-60.  
20 580
- 21 581 47. Bover LC, Cardó-Vila M, Kuniyasu A, Sun J, Rangel R, Takeya M, et al. A previously  
22 582 unrecognized protein-protein interaction between TWEAK and CD163: potential biological  
23 583 implications. *The Journal of Immunology*. 2007;178(12):8183-94.  
24 584
- 25 585 48. Urbonaviciene G, Martin-Ventura JL, Lindholt JS, Urbonavicius S, Moreno JA, Egido J, et  
26 586 al. Impact of soluble TWEAK and CD163/TWEAK ratio on long-term cardiovascular mortality in  
27 587 patients with peripheral arterial disease. *Atherosclerosis*. 2011;219(2):892-9.  
28 588
- 29 589 49. Moreno JA, Dejouvencel T, Labreuche J, Smadja DM, Dussiot M, Martin-Ventura JL, et  
30 590 al. Peripheral artery disease is associated with a high CD163/TWEAK plasma ratio.  
31 591 *Arteriosclerosis, thrombosis, and vascular biology*. 2010;30(6):1253-62.  
32 592
- 33 593 50. Leiro J, Álvarez E, Arranz JA, Laguna R, Uriarte E, Orallo F. Effects of cis-resveratrol on  
34 594 inflammatory murine macrophages: antioxidant activity and down-regulation of inflammatory  
35 595 genes. *Journal of leukocyte biology*. 2004;75(6):1156-65.  
36 596
- 37 597 51. D'Amore S, Vacca M, Graziano G, D'Orazio A, Cariello M, Martelli N, et al. Nuclear  
38 598 receptors expression chart in peripheral blood mononuclear cells identifies patients with  
39 599 Metabolic Syndrome. *Biochimica et Biophysica Acta (BBA)-Molecular Basis of Disease*.  
40 600 2013;1832(12):2289-301.  
41 601
- 42 602 52. Kirby A, GebSKI V, Keech AC. Determining the sample size in a clinical trial. *Medical*  
43 603 *journal of Australia*. 2002;177(5):256-7.  
44 604
- 45 605 53. Aadahl M, Jørgensen T. Validation of a new self-report instrument for measuring  
46 606 physical activity. *Medicine and science in sports and exercise*. 2003;35(7):1196-202.  
47 607
- 48 608 54. Control CfD, Prevention. Anthropometry procedures manual. National Center for  
49 609 Health Statistics: Hyattsville, MD. 2007.  
50 610
- 51 611 55. Rajab A, Azizi F. Ardeh (*Sesamum indicum*) could improve serum triglycerides and  
52 612 atherogenic lipid parameters in type 2 diabetic patients: a randomized clinical trial. *Archives of*  
53 613 *Iranian medicine*. 2013;16(11):652.  
54  
55  
56  
57  
58  
59  
60

1  
2  
3  
4  
5  
6  
7  
8  
9  
10  
11  
12  
13  
14  
15  
16  
17  
18  
19  
20  
21  
22  
23  
24  
25  
26  
27  
28  
29  
30  
31  
32  
33  
34  
35  
36  
37  
38  
39  
40  
41  
42  
43  
44  
45  
46  
47  
48  
49  
50  
51  
52  
53  
54  
55  
56  
57  
58  
59  
60

614 56. Motamed N, Miresmail SJH, Rabiee B, Keyvani H, Farahani B, Maadi M, et al. Optimal  
615 cutoff points for HOMA-IR and QUICKI in the diagnosis of metabolic syndrome and non-  
616 alcoholic fatty liver disease: A population based study. *Journal of diabetes and its*  
617 *complications*. 2016;30(2):269-74.  
618

619 57. Robledo D, Hernández-Urcera J, Cal RM, Pardo BG, Sánchez L, Martínez P, et al.  
620 Analysis of qPCR reference gene stability determination methods and a practical approach for  
621 efficiency calculation on a turbot (*Scophthalmus maximus*) gonad dataset. *BMC genomics*.  
622 2014;15(1):648.  
623

624 58. Pfaffl MW. A new mathematical model for relative quantification in real-time RT-PCR.  
625 *Nucleic acids research*. 2001;29(9):e45-e.

For peer review only



651 **Table 1:** Real-time PCR primer sequences

|                        | <b>Forward</b>         | <b>Reverse</b>         |
|------------------------|------------------------|------------------------|
| p53                    | GAGCTGAATGAGGCCTTGGA   | CTGAGTCAGGCCCTTCTGTCTT |
| p21                    | TGGAGACTCTCAGGGTCGAAA  | GGCGTTTGGAGTGGTAGAAATC |
| p16                    | CTTCCTGGACACGCTGGTG    | GCATGGTTACTGCCTCTGGTG  |
| PPAR $\alpha$          | CTATCATTTGCTGTGGAGATCG | AAGATATCGTCCGGGTGGTT   |
| GAPDH (Reference gene) | TGGTATCGTGGAAGGACTCATG | GCTTCACCACCTTCTTGATGTC |

652 GAPDH, Glyceraldehyde-3-Phosphate Dehydrogenase; PCR, Polymerase chain reaction; PPAR $\alpha$ ,

653 Peroxisome proliferator activated receptor alpha

654

1  
2  
3  
4  
5  
6  
7  
8  
9  
10  
11  
12  
13  
14  
15  
16  
17  
18  
19  
20  
21  
22  
23  
24  
25  
26  
27  
28  
29  
30  
31  
32  
33  
34  
35  
36  
37  
38  
39  
40  
41  
42  
43  
44  
45  
46  
47  
48  
49  
50  
51  
52  
53  
54  
55  
56  
57  
58  
59  
60

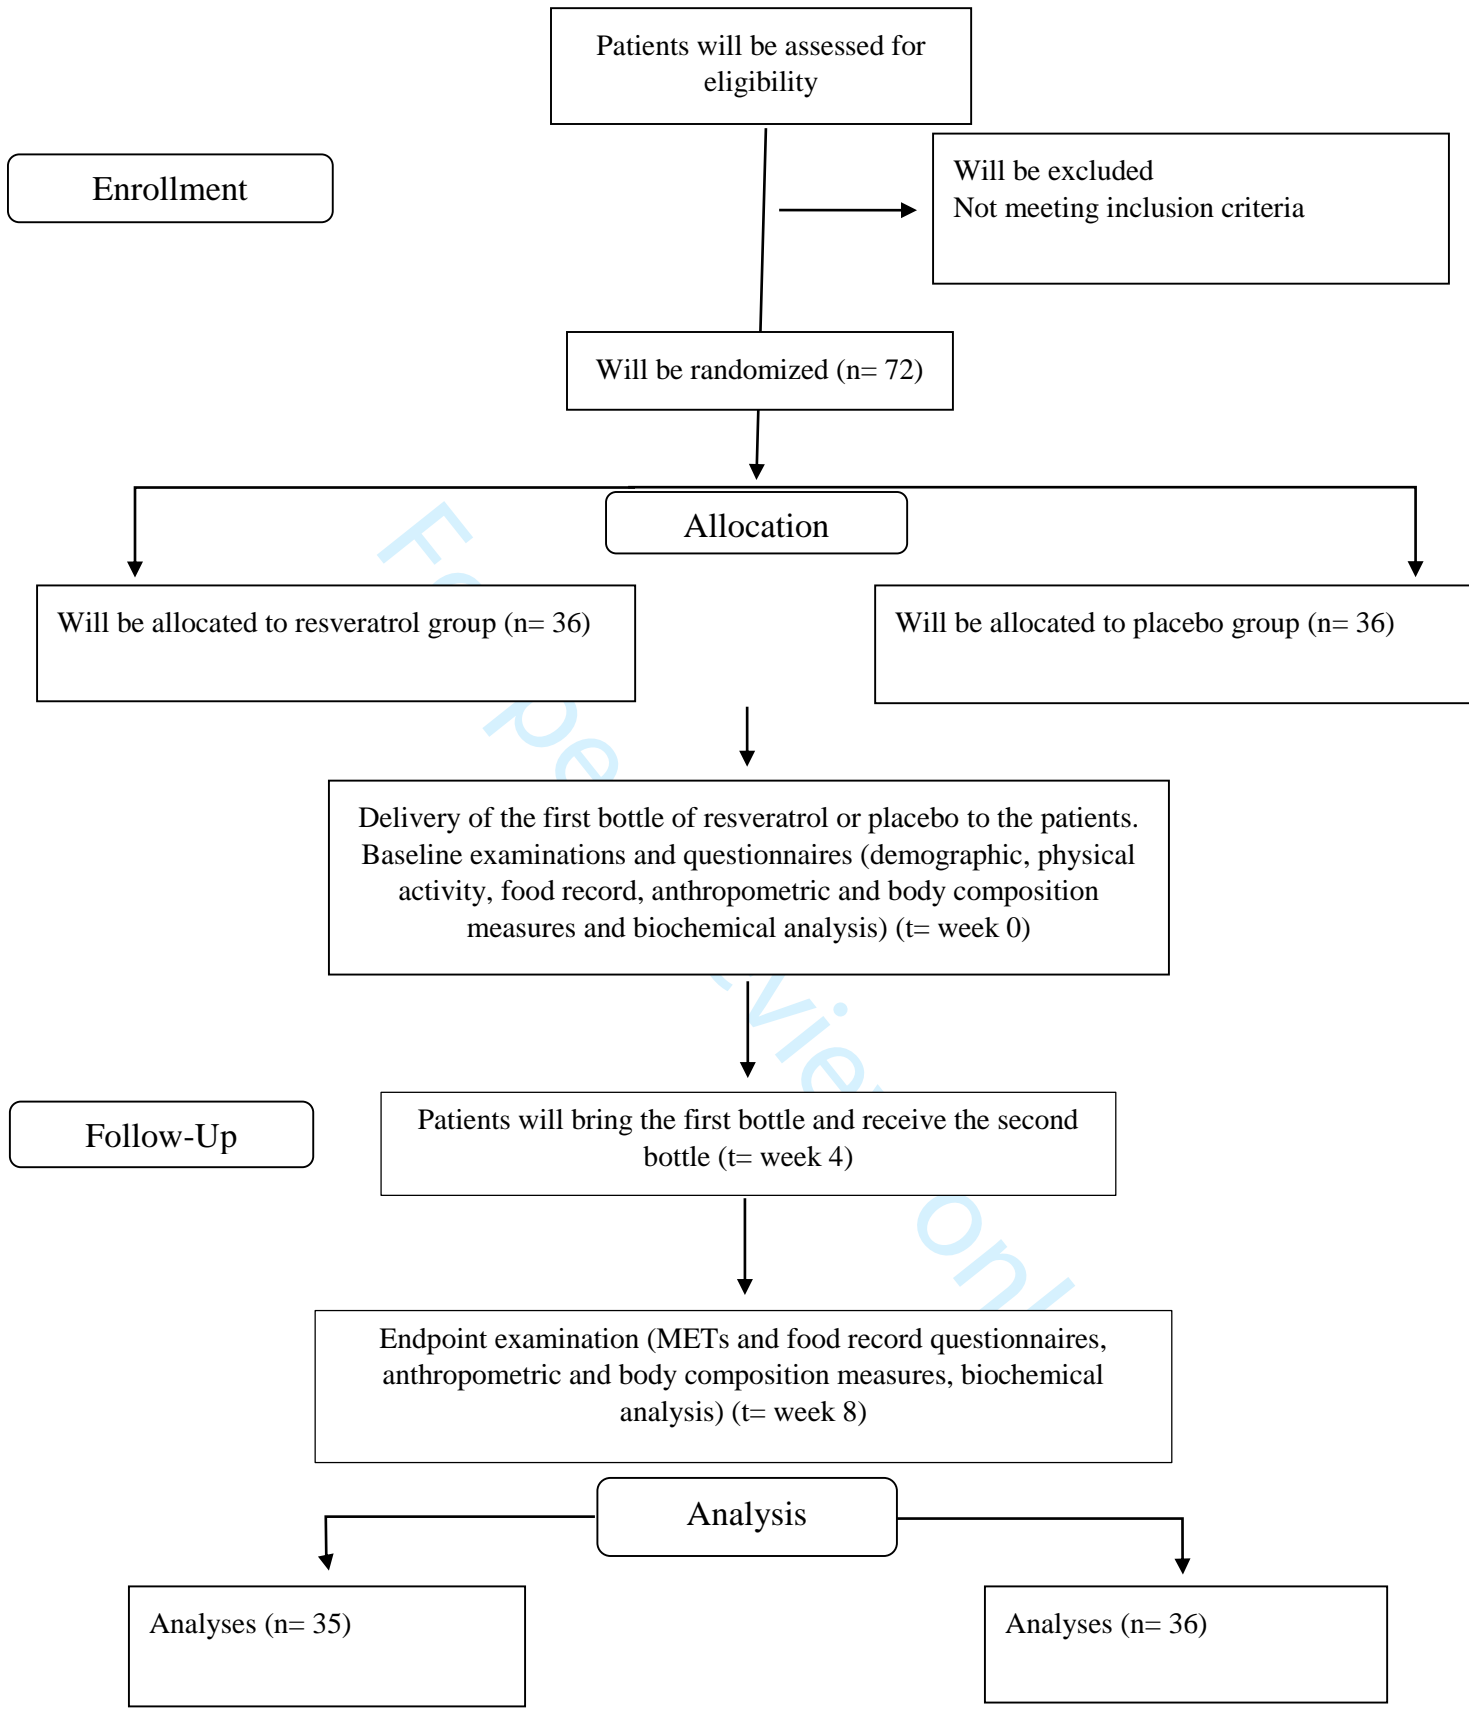

**Figure 1:** Overview of the study

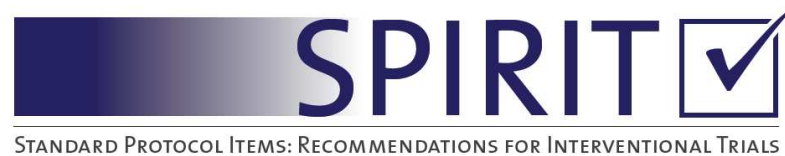

SPIRIT 2013 Checklist: Recommended items to address in a clinical trial protocol and related documents\*

| Section/item                                              | Item No | Description                                                                                                                                                                                                                                                                              | Addressed on page number |
|-----------------------------------------------------------|---------|------------------------------------------------------------------------------------------------------------------------------------------------------------------------------------------------------------------------------------------------------------------------------------------|--------------------------|
| <b>Administrative information</b>                         |         |                                                                                                                                                                                                                                                                                          |                          |
| Title                                                     | 1       | Descriptive title identifying the study design, population, interventions, and, if applicable, trial acronym                                                                                                                                                                             | 1                        |
| Trial registration                                        | 2a      | Trial identifier and registry name. If not yet registered, name of intended registry                                                                                                                                                                                                     | 3                        |
|                                                           | 2b      |                                                                                                                                                                                                                                                                                          |                          |
| Protocol version                                          | 3       | Date and version identifier                                                                                                                                                                                                                                                              | -                        |
| Funding                                                   | 4       | Sources and types of financial, material, and other support                                                                                                                                                                                                                              | 13                       |
| Roles and responsibilities                                | 5a      | Names, affiliations, and roles of protocol contributors                                                                                                                                                                                                                                  | 2 & 13                   |
|                                                           | 5b      | Name and contact information for the trial sponsor                                                                                                                                                                                                                                       | -                        |
|                                                           | 5c      | Role of study sponsor and funders, if any, in study design; collection, management, analysis, and interpretation of data; writing of the report; and the decision to submit the report for publication, including whether they will have ultimate authority over any of these activities | 13                       |
|                                                           | 5d      | Composition, roles, and responsibilities of the coordinating centre, steering committee, endpoint adjudication committee, data management team, and other individuals or groups overseeing the trial, if applicable (see Item 21a for data monitoring committee)                         | -                        |
| <b>Introduction</b>                                       |         |                                                                                                                                                                                                                                                                                          |                          |
| Background and rationale                                  | 6a      | Description of research question and justification for undertaking the trial, including summary of relevant studies (published and unpublished) examining benefits and harms for each intervention                                                                                       | 5-7                      |
|                                                           | 6b      | Explanation for choice of comparators                                                                                                                                                                                                                                                    | -                        |
| Objectives                                                | 7       | Specific objectives or hypotheses                                                                                                                                                                                                                                                        | 7                        |
| Trial design                                              | 8       | Description of trial design including type of trial (eg, parallel group, crossover, factorial, single group), allocation ratio, and framework (eg, superiority, equivalence, noninferiority, exploratory)                                                                                | 7                        |
| <b>Methods: Participants, interventions, and outcomes</b> |         |                                                                                                                                                                                                                                                                                          |                          |

|                                                                     |     |                                                                                                                                                                                                                                                                                                                                                                                |       |
|---------------------------------------------------------------------|-----|--------------------------------------------------------------------------------------------------------------------------------------------------------------------------------------------------------------------------------------------------------------------------------------------------------------------------------------------------------------------------------|-------|
| Study setting                                                       | 9   | Description of study settings (eg, community clinic, academic hospital) and list of countries where data will be collected. Reference to where list of study sites can be obtained                                                                                                                                                                                             | 7     |
| Eligibility criteria                                                | 10  | Inclusion and exclusion criteria for participants. If applicable, eligibility criteria for study centres and individuals who will perform the interventions (eg, surgeons, psychotherapists)                                                                                                                                                                                   | 8 & 9 |
| Interventions                                                       | 11a | Interventions for each group with sufficient detail to allow replication, including how and when they will be administered                                                                                                                                                                                                                                                     | 8     |
|                                                                     | 11b | Criteria for discontinuing or modifying allocated interventions for a given trial participant (eg, drug dose change in response to harms, participant request, or improving/worsening disease)                                                                                                                                                                                 | -     |
|                                                                     | 11c | Strategies to improve adherence to intervention protocols, and any procedures for monitoring adherence (eg, drug tablet return, laboratory tests)                                                                                                                                                                                                                              | 8     |
|                                                                     | 11d | Relevant concomitant care and interventions that are permitted or prohibited during the trial                                                                                                                                                                                                                                                                                  | 9     |
| Outcomes                                                            | 12  | Primary, secondary, and other outcomes, including the specific measurement variable (eg, systolic blood pressure), analysis metric (eg, change from baseline, final value, time to event), method of aggregation (eg, median, proportion), and time point for each outcome. Explanation of the clinical relevance of chosen efficacy and harm outcomes is strongly recommended | 7     |
| Participant timeline                                                | 13  | Time schedule of enrolment, interventions (including any run-ins and washouts), assessments, and visits for participants. A schematic diagram is highly recommended (see Figure)                                                                                                                                                                                               | 15    |
| Sample size                                                         | 14  | Estimated number of participants needed to achieve study objectives and how it was determined, including clinical and statistical assumptions supporting any sample size calculations                                                                                                                                                                                          | 9     |
| Recruitment                                                         | 15  | Strategies for achieving adequate participant enrolment to reach target sample size                                                                                                                                                                                                                                                                                            | -     |
| <b>Methods: Assignment of interventions (for controlled trials)</b> |     |                                                                                                                                                                                                                                                                                                                                                                                |       |
| Allocation:                                                         |     |                                                                                                                                                                                                                                                                                                                                                                                |       |
| Sequence generation                                                 | 16a | Method of generating the allocation sequence (eg, computer-generated random numbers), and list of any factors for stratification. To reduce predictability of a random sequence, details of any planned restriction (eg, blocking) should be provided in a separate document that is unavailable to those who enrol participants or assign interventions                       | 8     |
| Allocation concealment mechanism                                    | 16b | Mechanism of implementing the allocation sequence (eg, central telephone; sequentially numbered, opaque, sealed envelopes), describing any steps to conceal the sequence until interventions are assigned                                                                                                                                                                      | -     |
| Implementation                                                      | 16c | Who will generate the allocation sequence, who will enrol participants, and who will assign participants to interventions                                                                                                                                                                                                                                                      | -     |
| Blinding (masking)                                                  | 17a | Who will be blinded after assignment to interventions (eg, trial participants, care providers, outcome assessors,                                                                                                                                                                                                                                                              | 8     |

|                                                           |     |                                                                                                                                                                                                                                                                                                                                                                                                              |       |
|-----------------------------------------------------------|-----|--------------------------------------------------------------------------------------------------------------------------------------------------------------------------------------------------------------------------------------------------------------------------------------------------------------------------------------------------------------------------------------------------------------|-------|
|                                                           |     | data analysts), and how                                                                                                                                                                                                                                                                                                                                                                                      |       |
|                                                           | 17b | If blinded, circumstances under which unblinding is permissible, and procedure for revealing a participant's allocated intervention during the trial                                                                                                                                                                                                                                                         | -     |
| <b>Methods: Data collection, management, and analysis</b> |     |                                                                                                                                                                                                                                                                                                                                                                                                              |       |
| Data collection methods                                   | 18a | Plans for assessment and collection of outcome, baseline, and other trial data, including any related processes to promote data quality (eg, duplicate measurements, training of assessors) and a description of study instruments (eg, questionnaires, laboratory tests) along with their reliability and validity, if known. Reference to where data collection forms can be found, if not in the protocol | -     |
|                                                           | 18b | Plans to promote participant retention and complete follow-up, including list of any outcome data to be collected for participants who discontinue or deviate from intervention protocols                                                                                                                                                                                                                    | 8     |
| Data management                                           | 19  | Plans for data entry, coding, security, and storage, including any related processes to promote data quality (eg, double data entry; range checks for data values). Reference to where details of data management procedures can be found, if not in the protocol                                                                                                                                            | 10    |
| Statistical methods                                       | 20a | Statistical methods for analysing primary and secondary outcomes. Reference to where other details of the statistical analysis plan can be found, if not in the protocol                                                                                                                                                                                                                                     | 11    |
|                                                           | 20b | Methods for any additional analyses (eg, subgroup and adjusted analyses)                                                                                                                                                                                                                                                                                                                                     | _____ |
|                                                           | 20c | Definition of analysis population relating to protocol non-adherence (eg, as randomised analysis), and any statistical methods to handle missing data (eg, multiple imputation)                                                                                                                                                                                                                              | 12    |
| <b>Methods: Monitoring</b>                                |     |                                                                                                                                                                                                                                                                                                                                                                                                              |       |
| Data monitoring                                           | 21a | Composition of data monitoring committee (DMC); summary of its role and reporting structure; statement of whether it is independent from the sponsor and competing interests; and reference to where further details about its charter can be found, if not in the protocol. Alternatively, an explanation of why a DMC is not needed                                                                        | _____ |
|                                                           | 21b | Description of any interim analyses and stopping guidelines, including who will have access to these interim results and make the final decision to terminate the trial                                                                                                                                                                                                                                      | 12    |
| Harms                                                     | 22  | Plans for collecting, assessing, reporting, and managing solicited and spontaneously reported adverse events and other unintended effects of trial interventions or trial conduct                                                                                                                                                                                                                            | 9     |
| Auditing                                                  | 23  | Frequency and procedures for auditing trial conduct, if any, and whether the process will be independent from investigators and the sponsor                                                                                                                                                                                                                                                                  | _____ |
| <b>Ethics and dissemination</b>                           |     |                                                                                                                                                                                                                                                                                                                                                                                                              |       |
| Research ethics approval                                  | 24  | Plans for seeking research ethics committee/institutional review board (REC/IRB) approval                                                                                                                                                                                                                                                                                                                    | _____ |

|                               |     |                                                                                                                                                                                                                                                                                     |       |
|-------------------------------|-----|-------------------------------------------------------------------------------------------------------------------------------------------------------------------------------------------------------------------------------------------------------------------------------------|-------|
| Protocol amendments           | 25  | Plans for communicating important protocol modifications (eg, changes to eligibility criteria, outcomes, analyses) to relevant parties (eg, investigators, REC/IRBs, trial participants, trial registries, journals, regulators)                                                    | 7     |
| Consent or assent             | 26a | Who will obtain informed consent or assent from potential trial participants or authorised surrogates, and how (see Item 32)                                                                                                                                                        | _____ |
|                               | 26b | Additional consent provisions for collection and use of participant data and biological specimens in ancillary studies, if applicable                                                                                                                                               | _____ |
| Confidentiality               | 27  | How personal information about potential and enrolled participants will be collected, shared, and maintained in order to protect confidentiality before, during, and after the trial                                                                                                | 10    |
| Declaration of interests      | 28  | Financial and other competing interests for principal investigators for the overall trial and each study site                                                                                                                                                                       | 13    |
| Access to data                | 29  | Statement of who will have access to the final trial dataset, and disclosure of contractual agreements that limit such access for investigators                                                                                                                                     | 11    |
| Ancillary and post-trial care | 30  | Provisions, if any, for ancillary and post-trial care, and for compensation to those who suffer harm from trial participation                                                                                                                                                       | 9     |
| Dissemination policy          | 31a | Plans for investigators and sponsor to communicate trial results to participants, healthcare professionals, the public, and other relevant groups (eg, via publication, reporting in results databases, or other data sharing arrangements), including any publication restrictions | _____ |
|                               | 31b | Authorship eligibility guidelines and any intended use of professional writers                                                                                                                                                                                                      | _____ |
|                               | 31c | Plans, if any, for granting public access to the full protocol, participant-level dataset, and statistical code                                                                                                                                                                     | _____ |
| <b>Appendices</b>             |     |                                                                                                                                                                                                                                                                                     |       |
| Informed consent materials    | 32  | Model consent form and other related documentation given to participants and authorised surrogates                                                                                                                                                                                  | _____ |
| Biological specimens          | 33  | Plans for collection, laboratory evaluation, and storage of biological specimens for genetic or molecular analysis in the current trial and for future use in ancillary studies, if applicable                                                                                      | _____ |

\*It is strongly recommended that this checklist be read in conjunction with the SPIRIT 2013 Explanation & Elaboration for important clarification on the items. Amendments to the protocol should be tracked and dated. The SPIRIT checklist is copyrighted by the SPIRIT Group under the Creative Commons "[Attribution-NonCommercial-NoDerivs 3.0 Unported](https://creativecommons.org/licenses/by-nc-nd/3.0/)" license.
